# Supplementary material for: It depends on how you tell: a qualitative diagnostic analysis of the implementation climate for community-wide mass drug administration for soil-transmitted helminth
Source: PubMed Central journal article supplement (PMC9198697; doi:10.1136/bmjopen-2022-061682), 2022-06-14
Supplement: bmjopen-2022-061682.draft_revisions.pdf [file bmjopen-2022-061682.draft_revisions.pdf]

# BMJ Open

BMJ Open is committed to open peer review. As part of this commitment we make the peer review history of every article we publish publicly available.

When an article is published we post the peer reviewers' comments and the authors' responses online. We also post the versions of the paper that were used during peer review. These are the versions that the peer review comments apply to.

The versions of the paper that follow are the versions that were submitted during the peer review process. They are not the versions of record or the final published versions. They should not be cited or distributed as the published version of this manuscript.

BMJ Open is an open access journal and the full, final, typeset and author-corrected version of record of the manuscript is available on our site with no access controls, subscription charges or pay-per-view fees (<http://bmjopen.bmj.com>).

If you have any questions on BMJ Open's open peer review process please email [info.bmjopen@bmj.com](mailto:info.bmjopen@bmj.com)

# BMJ Open

## "It depends on how you tell": A diagnostic analysis of the implementation climate for community-wide mass drug administration for soil-transmitted helminths

|                               |                                                                                                                                                                                                                                                                                                                                                                                                                                                                                                                                                                                                                                                                                                                                                                                                                                                                                                                                                                                                                                                                                                                                                                                                                                                                                                                                                                                                                                                |
|-------------------------------|------------------------------------------------------------------------------------------------------------------------------------------------------------------------------------------------------------------------------------------------------------------------------------------------------------------------------------------------------------------------------------------------------------------------------------------------------------------------------------------------------------------------------------------------------------------------------------------------------------------------------------------------------------------------------------------------------------------------------------------------------------------------------------------------------------------------------------------------------------------------------------------------------------------------------------------------------------------------------------------------------------------------------------------------------------------------------------------------------------------------------------------------------------------------------------------------------------------------------------------------------------------------------------------------------------------------------------------------------------------------------------------------------------------------------------------------|
| Journal:                      | <i>BMJ Open</i>                                                                                                                                                                                                                                                                                                                                                                                                                                                                                                                                                                                                                                                                                                                                                                                                                                                                                                                                                                                                                                                                                                                                                                                                                                                                                                                                                                                                                                |
| Manuscript ID                 | bmjopen-2022-061682                                                                                                                                                                                                                                                                                                                                                                                                                                                                                                                                                                                                                                                                                                                                                                                                                                                                                                                                                                                                                                                                                                                                                                                                                                                                                                                                                                                                                            |
| Article Type:                 | Original research                                                                                                                                                                                                                                                                                                                                                                                                                                                                                                                                                                                                                                                                                                                                                                                                                                                                                                                                                                                                                                                                                                                                                                                                                                                                                                                                                                                                                              |
| Date Submitted by the Author: | 11-Feb-2022                                                                                                                                                                                                                                                                                                                                                                                                                                                                                                                                                                                                                                                                                                                                                                                                                                                                                                                                                                                                                                                                                                                                                                                                                                                                                                                                                                                                                                    |
| Complete List of Authors:     | Avokpaho, Euripide; Institut de Recherche Clinique du Benin<br>Lawrence, Sarah; University of Washington, Pediatrics<br>Roll, Amy; University of Washington, Department of Global Health<br>Titus, Angelin; Christian Medical College Vellore<br>Jacob, Yesudoss; Christian Medical College Vellore<br>PUTHUPALAYAM KALIAPPAN, SARAVANAKUMAR; Christian Medical College Vellore, Division of Gastrointestinal Sciences<br>Gwayi-Chore, Marie Claire; University of Washington, Department of Global Health; The DeWorm3 Project<br>Chabi, Félicien; Institut de Recherche Clinique du Bénin<br>Togbevi, Comlanvi; Institut de Recherche Clinique du Bénin<br>Elijan, Abiguel Belou; Institut de Recherche Clinique du Bénin<br>Nindi, Providence; Blantyre Institute for Community Outreach<br>Walson, Judd L; University of Washington, Department of Global Health; The DeWorm3 Project<br>Ajjampur, Sitara; Christian Medical College Vellore, The Wellcome Trust Resaearch Laboratory, Division of Gastrointestinal Sciences<br>Ibikounle, Moudachirou; Institut de Recherche Clinique du Benin; Universite d'Abomey-Calavi, Centre de Recherche pour la lutte contre les Maladies Infectieuses Tropicales (CReMIT/TIDRC)<br>Kalua, Khumbo; Blantyre Institute for Community Outreach<br>Aruldas, Kumudha; Christian Medical College Vellore<br>Means, Arianna; University of Washington, Department of Global Health; The DeWorm3 Project |
| Keywords:                     | Public health < INFECTIOUS DISEASES, Tropical medicine < INFECTIOUS DISEASES, Community child health < PAEDIATRICS, QUALITATIVE RESEARCH                                                                                                                                                                                                                                                                                                                                                                                                                                                                                                                                                                                                                                                                                                                                                                                                                                                                                                                                                                                                                                                                                                                                                                                                                                                                                                       |
|                               |                                                                                                                                                                                                                                                                                                                                                                                                                                                                                                                                                                                                                                                                                                                                                                                                                                                                                                                                                                                                                                                                                                                                                                                                                                                                                                                                                                                                                                                |

SCHOLARONE™  
Manuscripts

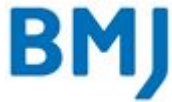

I, the Submitting Author has the right to grant and does grant on behalf of all authors of the Work (as defined in the below author licence), an exclusive licence and/or a non-exclusive licence for contributions from authors who are: i) UK Crown employees; ii) where BMJ has agreed a CC-BY licence shall apply, and/or iii) in accordance with the terms applicable for US Federal Government officers or employees acting as part of their official duties; on a worldwide, perpetual, irrevocable, royalty-free basis to BMJ Publishing Group Ltd ("BMJ") its licensees and where the relevant Journal is co-owned by BMJ to the co-owners of the Journal, to publish the Work in this journal and any other BMJ products and to exploit all rights, as set out in our [licence](#).

The Submitting Author accepts and understands that any supply made under these terms is made by BMJ to the Submitting Author unless you are acting as an employee on behalf of your employer or a postgraduate student of an affiliated institution which is paying any applicable article publishing charge ("APC") for Open Access articles. Where the Submitting Author wishes to make the Work available on an Open Access basis (and intends to pay the relevant APC), the terms of reuse of such Open Access shall be governed by a Creative Commons licence – details of these licences and which [Creative Commons](#) licence will apply to this Work are set out in our licence referred to above.

Other than as permitted in any relevant BMJ Author's Self Archiving Policies, I confirm this Work has not been accepted for publication elsewhere, is not being considered for publication elsewhere and does not duplicate material already published. I confirm all authors consent to publication of this Work and authorise the granting of this licence.

1  
2  
3 1 ***It depends on how you tell: A diagnostic analysis of the implementation climate for community-wide***  
4  
5 2 **mass drug administration for soil-transmitted helminths**  
6  
7

8  
9  
10  
11 4 Euripide Avokpaho<sup>1†</sup>, Sarah Lawrence<sup>2†</sup>, Amy Roll<sup>2,3</sup>, Angelin Titus<sup>4</sup>, Yesudoss Jacob<sup>4</sup>, Saravanakumar  
12  
13 5 Puthupalayam Kaliappan<sup>4</sup>, Marie Claire Gwayi-Chore<sup>2,3</sup>, Félicien Chabi<sup>1</sup>, Comlanvi Innocent Togbevi<sup>1</sup>,  
14  
15 6 Abiguel Belou Elijan<sup>1</sup>, Providence Nindi<sup>5</sup>, Judd L Walson<sup>2</sup>, Sitara Swarna Rao Ajjampur<sup>4</sup>, Moudachirou  
16  
17 7 Ibikounlé<sup>1,6</sup>, Khumbo Kalua<sup>5</sup>, Kumudha Aruldas<sup>4</sup>, Arianna Rubin Means<sup>\*2,3</sup>  
18  
19

20  
21  
22 9 † shared first authorship  
23  
24

25  
26  
27 11 <sup>1</sup> Institut de Recherche Clinique du Bénin, Abomey-Calavi, Bénin  
28

29 12 <sup>2</sup> Department of Global Health, University of Washington, Seattle, WA, USA  
30

31 13 <sup>3</sup> The DeWorm3 Project, Seattle, Washington, USA  
32

33 14 <sup>4</sup> The Wellcome Trust Research Laboratory, Division of Gastrointestinal Sciences, Christian Medical  
34  
35 15 College, Vellore, India  
36  
37

38 16 <sup>5</sup> Blantyre Institute for Community Outreach, Blantyre, Malawi  
39

40 17 <sup>6</sup> Centre de Recherche pour la lutte contre les Maladies Infectieuses Tropicales (CReMIT/TIDRC), Université  
41  
42 18 d'Abomey-Calavi, Benin  
43  
44

45  
46  
47 20 \* Corresponding author  
48

49 21 Email: aerubin@uw.edu  
50  
51

52  
53  
54 23  
55  
56 24 Word count: 5493  
57  
58  
59  
60

1  
2  
3 25 I, the Submitting Author has the right to grant and does grant on behalf of all authors of the Work (as  
4  
5 26 defined in the below author licence), an exclusive licence and/or a non-exclusive licence for  
6  
7 27 contributions from authors who are: i) UK Crown employees; ii) where BMJ has agreed a CC-BY  
8  
9 28 licence shall apply, and/or iii) in accordance with the terms applicable for US Federal Government  
10  
11 29 officers or employees acting as part of their official duties; on a worldwide, perpetual, irrevocable,  
12  
13 30 royalty-free basis to BMJ Publishing Group Ltd (“BMJ”) its licensees and where the relevant Journal  
14  
15 31 is co-owned by BMJ to the co-owners of the Journal, to publish the Work in BMJ Global Health and  
16  
17 32 any other BMJ products and to exploit all rights, as set out in our [licence](#).  
18  
19 33

20  
21 34 The Submitting Author accepts and understands that any supply made under these terms is made  
22  
23 35 by BMJ to the Submitting Author unless you are acting as an employee on behalf of your employer  
24  
25 36 or a postgraduate student of an affiliated institution which is paying any applicable article publishing  
26  
27 37 charge (“APC”) for Open Access articles. Where the Submitting Author wishes to make the Work  
28  
29 38 available on an Open Access basis (and intends to pay the relevant APC), the terms of reuse of  
30  
31 39 such Open Access shall be governed by a Creative Commons licence – details of these licences  
32  
33 40 and which [Creative Commons](#) licence will apply to this Work are set out in our licence referred to  
34  
35 41 above.  
36  
37  
38  
39  
40  
41  
42  
43  
44  
45  
46  
47  
48  
49  
50  
51  
52  
53  
54  
55  
56  
57  
58  
59  
60

## 42 ABSTRACT

43 **Objectives:** Current soil-transmitted helminth (STH) morbidity control guidelines primarily target  
44 deworming of pre-school and school-age children. Emerging evidence suggests that community-wide  
45 mass drug administration (cMDA) may interrupt STH transmission. However, the success of such programs  
46 depends upon achieving high treatment coverage and uptake. This formative analysis was conducted to  
47 evaluate the implementation climate for cMDA and to determine barriers and facilitators to launch.

48 **Settings:** Prior to the launch of a cMDA trial in Benin, India, and Malawi.

49 **Participants:** Community members (adult women and men, children, and local leaders), community drug  
50 distributors (CDDs), and health facility workers.

51 **Design:** We conducted 48 focus group discussions (FGDs) with community members, 13 FGDs with CDDs,  
52 and 5 FGDs with health facility workers in twelve randomly selected clusters across the three study  
53 countries. We utilized the Consolidated Framework for Implementation Research (CFIR) to guide the  
54 design of the interview guide and thematic analysis.

55 **Results:** Across all three sites, aspects of the implementation climate that were facilitators to cMDA  
56 launch included: high community member demand for cMDA, integration of cMDA into existing  
57 vaccination campaigns and/or health services, and engagement with familiar health workers. Barriers to  
58 launching cMDA included mistrust toward medical interventions, fear of side effects, and limited  
59 perceived need for interrupting STH transmission. We include specific recommendations from community  
60 members regarding cMDA distribution sites, personnel requirements, delivery timing and incentives,  
61 leaders to engage, and methods for mobilizing participants.

62 **Conclusions:** Prior to launching the cMDA program as an alternative to school-based MDA, cMDA was  
63 found to be generally acceptable across diverse geographic and demographic settings. Community

1  
2  
3 64 members, CDDs, and health workers felt that engaging communities and tailoring programs to the local  
4  
5 65 context are critical for success. Potential barriers may be mitigated by identifying local concerns and  
6  
7 66 addressing them via targeted community sensitization prior to implementation.  
8  
9  
10  
11 67

## 14 68 **Strengths and limitations of this study**

- 17 69 • This study highlights opportunities and challenges to launching community-wide mass drug  
18 70 administration (cMDA) for STH as an alternative to school-based MDA from the perspective of  
19 71 community members and the health delivery workforce that will be responsible for delivery of future  
20 72 cMDA programs.
- 23 73 • Findings from three diverse settings strengthens opportunities to understand similarities and  
24 74 differences across geographic areas.
- 26 75 • Some participants may have heard about DeWorm3 before participating in focus-group discussions  
27 76 (FGDs), which may pose threats to social desirability and response biases.
- 29 77 • Although a large number of FGDs were conducted across heterogeneous settings, the generalizability  
30 78 of study findings may not be translatable to other STH-endemic areas.

## 41 79 42 43 44 80 **INTRODUCTION**

45  
46  
47  
48 81 Neglected tropical diseases (NTDs) affect some of the world's most impoverished populations and  
49  
50 82 contribute to a variety of morbidities that exacerbate existing health and economic inequities (1).  
51  
52 83 Infections with one NTD, soil-transmitted helminths (STH), are associated with anemia, cognitive  
53  
54 84 development delay, growth stunting, pre-term birth, and other adverse outcomes (2). World Health  
55  
56  
57  
58  
59  
60

1  
2  
3 85 Organization (WHO) guidelines recommend control of STH morbidities via annual or bi-annual deworming  
4  
5 86 of pre-school and school-age children and other high-risk groups, including pregnant women and  
6  
7 87 adolescent girls (3). However, in many settings, the current STH strategy would likely need to be continued  
8  
9  
10 88 until significant economic development and universal water, sanitation and hygiene (WASH) access are  
11  
12 89 broadly available to stop transmission of STH (4). Emerging evidence suggests that it may be possible to  
13  
14 90 interrupt transmission of STH by expanding deworming to treat individuals of all ages via community-wide  
15  
16 91 MDA (cMDA) (5, 6).

17  
18  
19 92 The current standard of care for STH is school-based MDA to reach pre-school and school-age children,  
20  
21 93 and many school-based deworming programs have been successfully implemented for decades.  
22  
23 94 Transitioning from school-based MDA to cMDA for community-level STH transmission interruption will  
24  
25 95 require adapting long withstanding programs or designing new platforms for reaching much larger target  
26  
27 96 populations. These transitions should be approached carefully, as they will likely affect community  
28  
29 97 member and health worker attitudes towards and engagement in new programs. The success of cMDA in  
30  
31 98 interrupting transmission of STH is indeed predicated upon programs attaining high treatment coverage  
32  
33 99 (drug receipt) and uptake (drug ingestion) (7, 8). Many STH-endemic communities have a long history of  
34  
35 100 participating in other community-based mass distribution programs, including campaigns for lymphatic  
36  
37 101 filariasis (LF), onchocerciasis, trachoma, malaria bed net distribution, and/or mass immunization programs  
38  
39 102 such as polio campaigns (9). Factors that influence participation in mass campaigns include recipient trust  
40  
41 103 in programs and efforts to tailor programs to local conditions (10). Negative campaign experiences or  
42  
43 104 perceptions can compromise the success of future programs, particularly those requiring high coverage  
44  
45 105 over multiple years to reach targeted transmission endpoints (11, 12).

46  
47 106 Formative qualitative research can be used to understand community-member and implementer  
48  
49 107 perceptions of past, ongoing, or prospective community-based campaigns. Diagnostic analyses, an  
50  
51 108 application of formative evaluations, are particularly helpful in illuminating processes that can facilitate



1  
2  
3 109 or impede implementation. In this study, we perform a diagnostic analysis of the implementation climate  
4  
5 110 to proactively identify factors influencing the launch of cMDA for STH transmission interruption, including  
6  
7 111 (1) perceptions of current deworming practice, (2) potential barriers and facilitators to transitioning from  
8  
9 112 school-based MDA to cMDA delivery, and (3) perceived effectiveness and need for cMDA (13).  
10  
11  
12

## 13 113 **METHODS**

14  
15  
16 114 This analysis was conducted at the outset of the DeWorm3 Project, a large hybrid type I community cluster  
17  
18 115 randomized trial in Benin, India, and Malawi (Table 1). DeWorm3 aims to determine the feasibility of  
19  
20 116 interrupting STH transmission using biannual cMDA, relative to standard-of-care school-based MDA (14-  
21  
22 117 16).  
23  
24  
25

26 118

27  
28 119  
29  
30  
31  
32  
33  
34  
35  
36  
37  
38  
39  
40  
41  
42  
43  
44  
45  
46  
47  
48  
49  
50  
51  
52  
53  
54  
55  
56  
57  
58  
59  
60

**Table 1. Overview of study sites**

|                                                 | Benin                                                                     | India                                                                                                                    | Malawi                                                                                                                |
|-------------------------------------------------|---------------------------------------------------------------------------|--------------------------------------------------------------------------------------------------------------------------|-----------------------------------------------------------------------------------------------------------------------|
| <b>Site</b>                                     | Commune of Comè                                                           | Vellore and Thiruvannamalai Districts, Tamil Nadu                                                                        | Mangochi District                                                                                                     |
| <b>Geographic area of site (km<sup>2</sup>)</b> | 148                                                                       | 477                                                                                                                      | 289                                                                                                                   |
| <b>Total number of households</b>               | 24,378                                                                    | 36,536                                                                                                                   | 27,750                                                                                                                |
| <b>Population size</b>                          | 94,969                                                                    | 140,932                                                                                                                  | 121,819                                                                                                               |
| <b>Standard of care</b>                         | Annual school-based MDA targeting children 5-14 years of age              | Biannual school-based MDA on National Deworming Days targeting children 1-19 years of age                                | Annual school-based MDA and Child Health Days targeting children 1-14 years of age                                    |
| <b>cMDA workforce</b>                           | Community drug distributors (CDDs), coordinated by the Ministry of Health | CDDs and Accredited Social Health Activists (ASHA), women working as health educators and promoters in their communities | Community health workers (Health Surveillance Assistants) who also fill the rolls of CDDs, coordinating with teachers |

**120 Sampling strategy**

121 Key stakeholders shaping the implementation climate for cMDA include community members and local  
 122 health workers. Focus group discussions (FGDs) were conducted separately with groups of community  
 123 members, including adult women and men (over 15 years), community leaders, and children (ages 12-15  
 124 years of age), local health workers, including CDDs, and Ministry of Health (MOH) health facility workers  
 125 who often serve as CDD supervisors.

126 Prior to trial randomization (e.g., before designations of intervention or control clusters were made), four  
 127 clusters were randomly selected in each site to conduct community-level FGDs. In each cluster, one FGD  
 128 was conducted within each community member strata (four total), two FGDs among drug distributors,  
 129 and one FGD among local MOH health facility workers. The sampling strategy for identifying and recruiting  
 130 community members for FGDs within each cluster differed slightly by site (Table 2). In India, purposive  
 131 sampling was employed, in which village leaders/influencers identified potential participants. In Benin and  
 132 Malawi, community members were randomly selected to participate from a pool of individuals who  
 133 attended outreach meetings at the chiefs/headmen's residence. The first five randomly approached

134 individuals from each demographic strata who agreed to participate were invited to attend FGDs within  
 135 the next week (except children, for whom parents/caregivers were approached). No more than one  
 136 individual per household was selected to participate in an FGD in a given cluster. Transportation was  
 137 offered to individuals who needed access to the FGD location. In Benin and India, local leaders were  
 138 chosen using purposive quota sampling. Purposive quota sampling was used to invite CDDs and health  
 139 workers from local health facilities in each cluster to participate in FGDs.

140 **Table 2: Sampling strategy by stakeholder group**

| Stakeholder                             | Targeted sample size (per FGD) | Sampling strategy                                                             |
|-----------------------------------------|--------------------------------|-------------------------------------------------------------------------------|
| Community members                       |                                |                                                                               |
| Adult women (15+ years of age)          | 5-10                           | Purposive sampling (India)<br>Random sampling (Benin <sup>1</sup> and Malawi) |
| Adult men (15+ years of age)            | 5-10                           |                                                                               |
| Local leaders                           | 5-10                           |                                                                               |
| Children (12-15 years of age)           | 5-10                           |                                                                               |
| Health center staff and CDD supervisors | 5-10                           | Purposive quota sampling                                                      |
| CDDs                                    | 10-15                          | Purposive quota sampling                                                      |

<sup>1</sup> Purposive quota sampling was used to sample local leaders in Benin and India

## 142 Data collection

143 This diagnostic analysis study design is informed by the Consolidated Framework for Implementation  
 144 Research (CFIR), a meta-theoretical framework of 38 constructs that provides a typology of constructs for  
 145 characterizing potential determinants (barriers and facilitators) to implementation from the perspective  
 146 of individuals involved in implementation (17). CFIR constructs are organized according to five major  
 147 domains influencing implementation and implementation effectiveness including (1) the intervention, (2)  
 148 the inner setting, (3) the outer settings, (4) the individuals involved, and (5) the process for accomplishing  
 149 the intervention. While the CFIR can be used at any stage of implementation, when applied pre-  
 150 implementation, the CFIR can help proactively identify opportunities and challenges facing  
 151 implementation and inform adaptations to implementation strategies for the local context (17, 18).

1  
2  
3 152 We drew upon the CFIR to inform the design of four semi-structured interview guides with a mix of  
4  
5 153 respondent and informant style questions, tailored to each stakeholder group (one question guide was  
6  
7 154 used for all adult community members). In this study, we identified *a priori* 23 CFIR constructs across all  
8  
9  
10 155 five domains that we hypothesized would influence the implementation climate for cMDA and which were  
11  
12 156 appropriate for use during formative research prior to implementation (Appendix 1) (18). The question  
13  
14 157 guides were piloted and adapted slightly as necessary within each site to ensure that the questions were  
15  
16 158 clear, meaningful, and culturally appropriate. Site adapted question guides were thereafter translated  
17  
18 159 into local languages including Yao (Malawi) and Tamil (India), and the official language (French) in Benin.  
19  
20  
21 160 FGD facilitators in Benin adapted the French question guide to local languages, including Watchi and  
22  
23 161 Pédah when necessary, during FGD facilitation.

24  
25  
26 162 All participants provided written consent prior to the start of the FGD. The parents or caregivers of  
27  
28 163 participating children similarly provided written consent and children ages 12-15 also provided written  
29  
30 164 assent. Consent and assent could also be provided by a thumbprint in the presence of a witness. FGDs  
31  
32 165 were conducted in private locations with both a facilitator and notetaker present and all FGDs were audio-  
33  
34 166 recorded with participant permission.

## 35 36 37 38 167 **Analysis**

39  
40  
41 168 Audio files were transcribed verbatim in the local or official language. For each transcript, two one-minute  
42  
43 169 random spot checks were conducted on each audio file for quality assurance. All transcripts were then  
44  
45 170 translated into English. All transcriptions and their translations were reviewed by a second individual  
46  
47 171 fluent in both English and the local language for quality assurance.

48  
49  
50  
51 172 Coders were based in each DeWorm3 site as well as at the central level (University of Washington,  
52  
53 173 Seattle). For data collected in Benin and India, two primary coders were assigned to each transcript, with  
54  
55 174 a third coder designated as the “tie-breaker.” When possible, at least one coder was based at the site in  
56  
57  
58  
59

1  
2  
3 175 which the data were collected, and the other coder was a member of the DeWorm3 central team. For  
4  
5 176 data collected in Malawi, a single primary coder from the central level coded the data while a secondary  
6  
7 177 coder at the site reviewed and validated the findings, due to coder availability. Each primary coder  
8  
9  
10 178 independently read and coded each transcript primarily using a deductive approach and a CFIR-based  
11  
12 179 codebook. Coding teams from each country and the central level met via conference calls to iteratively  
13  
14 180 refine code definitions and code inclusion/exclusion criteria until a final codebook was established. After  
15  
16 181 a transcript was coded, the coders assigned to the transcript met via conference call for consensus  
17  
18 182 meetings to discuss where applied codes diverged. When necessary, a third coder weighed in where  
19  
20  
21 183 consensus between primary coders was not reached.

22  
23  
24 184 The final coded transcripts were used to create case memos that were grouped by stakeholder category  
25  
26 185 and site. The case memos included a summary of how the code was applied for a given stakeholder group,  
27  
28 186 a justification for the summary provided noting code patterns and latent messages, and specific quotes  
29  
30 187 highlighting how the code was applied. The summaries, patterns, and themes from the coded transcripts  
31  
32  
33 188 and case memos were used to guide thematic analysis, an analytical method that is useful for summarizing  
34  
35 189 key features of large datasets using a clearly-structured approach (19, 20).

### 36 37 38 190 **Patient and public involvement**

39  
40  
41 191 Community members and health workers living in the sampled STH endemic areas were not involved in  
42  
43 192 design, conduct, or reporting of this qualitative study. However, all feedback from community members  
44  
45 193 was used to shape a subsequent community-based intervention within a larger clinical trial.

### 46 47 48 194 **Ethical approval**

49  
50  
51 195 This study has been reviewed and approved by the Institut de Recherche Clinique du Bénin (IRCB) through  
52  
53 196 the National Ethics Committee for Health Research (002-2017/CNERS-MS) from the Ministry of Health in  
54  
55 197 Benin, The London School of Hygiene and Tropical Medicine (12013), The College of Medicine Research  
56  
57  
58  
59  
60

1  
2  
3 198 Ethics Committee (P.04/17/2161) in Malawi, and Christian Medical College, Vellore, in India (10392). The  
4  
5 199 study was also approved by The Human Subjects Division at the University of Washington  
6  
7 200 (STUDY00000180).  
8  
9

## 10 201 **RESULTS**

11  
12  
13  
14 202 In this study, 48 FGDs were conducted with community members – four FGDs (one per cluster) for each  
15  
16 203 stakeholder group: adult women, adult men, children, and local leaders, totaling 16 in each site, 13 with  
17  
18 204 CDDs (two each in Benin and Malawi, nine in India), and five with CDD supervisors (two in Benin and three  
19  
20  
21 205 in India).  
22

23  
24 206 Across FGDs and settings, key themes emerged within four CFIR domains: intervention characteristics,  
25  
26 207 inner settings, characteristics of individuals, and process. Factors positively influencing the  
27  
28 208 implementation climate for cMDA across sites included community member demand for community-wide  
29  
30 209 (versus school-based) MDA, integration of MDA into existing vaccination campaigns and/or health  
31  
32 210 services, and engagement with health workers (including trained CDDs) rather than community  
33  
34 211 volunteers. Factors negatively affecting the implementation climate across sites included mistrust and  
35  
36 212 resistance toward medical interventions, fear of side effects, and limited perceived need. Additional  
37  
38 213 process recommendations emerged as key themes that varied slightly across sites and included  
39  
40 214 suggestions regarding MDA distribution sites and distributors, treatment costs/financial incentives,  
41  
42 215 engaging leaders, and engaging participants through sensitization and mobilization efforts.  
43  
44  
45

### 46 216 **Intervention characteristics**

47  
48  
49 217 *Relative advantage: cMDA is preferable to school-based MDA*

50  
51  
52 218 The CFIR construct of *relative advantage* captures participant perceptions regarding the benefits of  
53  
54 219 implementing one intervention compared to an alternative (17). Across community member and health  
55  
56  
57  
58  
59

1  
2  
3 220 worker/CDD groups and sites, participants identified a preference for cMDA as compared to school-based  
4  
5 221 deworming programs for several reasons. Participants stressed that providing STH treatment to both  
6  
7 222 children and adults is the only way to prevent STH reinfection.

9  
10 223 Across stakeholder groups, participants also highlighted that children who were not enrolled in school  
11  
12 224 would be able to receive treatment through cMDA. Adult community members in Benin and Malawi were  
13  
14 225 particularly concerned that school-based MDA campaigns do not always provide parents with treatment  
15  
16 226 information prior to distribution and often administer the medications without parental consent or trust.  
17  
18 227 Additionally, they thought uptake would be improved if parents are involved in treatment administration.

19  
20  
21  
22 228 *It's better to go through the parents to reach the kids. Parents know how to approach their*  
23  
24 229 *children, manage them and make them understand the benefit of the thing [medicine]. The child*  
25  
26 230 *will easily take the medicine without any effect. (Cluster 26, Women, Benin)*

27  
28  
29  
30 231 Across FGDs and sites, participants were enthusiastic that cMDA could interrupt STH transmission and  
31  
32 232 increase parental engagement with the intervention, particularly to enable parental consent, and allow  
33  
34 233 them to encourage and confirm their child's uptake.

35  
36  
37 234 *Design quality & packaging: Door-to-door MDA delivery by highly trained, familiar distributors is preferred*

38  
39  
40 235 *Design quality* describes stakeholder recommendations for how to bundle, present, and assemble the  
41  
42 236 intervention (17). Across sites and stakeholder groups, campaigns that delivered services door-to-door  
43  
44 237 were considered more desirable than those that used a central distribution site (Table 3). In India,  
45  
46 238 community participants reflected upon past experiences with LF MDA campaigns that were door-to-door  
47  
48 239 whereas participants in Benin reflected upon experiences with door-to-door vaccination campaigns and  
49  
50 240 bed net distributions at local health centers. Long waiting times, associated with lost income and  
51  
52 241 productivity, were identified as primary barriers to central distribution sites. One female participant in  
53  
54 242 Benin reported she would not wait around all day for someone to distribute MDA but instead would just

1  
2  
3 243 purchase the medications herself, given their low costs. Additionally, participants stressed that door-to-  
4  
5 244 door campaigns improve equity by increasing the likelihood of reaching those unable to travel due to  
6  
7 245 financial or physical barriers.  
8  
9

10 246 *The HSAs should go door by door to give people the medicine as some people, for example old and*  
11  
12 247 *crippled, may not be able to go and access the drugs. But if they go door by door, then everyone*  
13  
14 248 *receives the drugs and not only those who walk. (Cluster 21, Women, Malawi)*  
15  
16  
17

18 249 Community members and leaders across sites, participants preferred to receive treatment from  
19  
20 250 individuals perceived to be health professionals, especially a familiar health worker or CDD, or someone  
21  
22 251 working with a well-respected non-governmental organization (NGO). Participants believed that  
23  
24 252 increased health worker engagement could alleviate community mistrust linked with fear of adverse  
25  
26 253 events by medicalizing the distribution process and making community members feel safer, thereby  
27  
28 254 increase treatment coverage. Men in Malawi stressed that health volunteers are often poorly respected  
29  
30 255 and mistrusted, while clinically-trained health professionals are typically more respected. Of paramount  
31  
32 256 importance for adult community members and CDDs was that distributors are known members of the  
33  
34 257 community.  
35  
36  
37

38 258 *When community members see new faces during a project, they tend to be resistant, so it is better*  
39  
40 259 *to use people from the area and not strangers. If not, this may not be successful. (Cluster 21, Local*  
41  
42 260 *leader, Malawi)*  
43  
44  
45

46 261 *But above all, it is necessary to involve health workers, who the population trusts....Many are afraid*  
47  
48 262 *because they do not see us, they do not see the health workers on the ground. (Health Center Staff,*  
49  
50 263 *Benin)*  
51  
52

53 264 In Benin, local leaders noted that when NGOs engage in CMDA, it is important they are well-respected and  
54  
55 265 have well-recognized logos that community members are familiar with and trust based on their prior  
56  
57  
58



1  
2  
3 266 work. Regardless if cMDA is administered by a health professional, volunteer, or NGO, community  
4  
5 267 members across sites noted that their willingness to participate in cMDA is driven by their perception that  
6  
7  
8 268 they have been fully and accurately informed about cMDA, and that they have had time to ask questions.  
9

10 269 *Even if it [deworming medication] is given for free, they will not eat it unless it has been explained*  
11  
12 *and given. If they are told they will benefit...with awareness in the villages, they will eat it. (Cluster*  
13 270  
14  
15 271 *12, CDD, India)*  
16

17  
18 272 Community members expressed that they wanted to be treated with dignity and that their participation  
19  
20 273 in community-wide public health campaigns of any kind should not be taken for granted.  
21

22  
23 274 *Whether they eat the tablet or not it depends on to what extent this information reaches the*  
24  
25 275 *people. It depends on how you tell. (Cluster 34, Men, India)*  
26

27  
28 276 *The messages about drugs should be given to us in good time and not just tell us like today that*  
29  
30 277 *tomorrow we will have a drug administration activity. Many people need time to ask questions*  
31  
32 278 *and clear their myths before they get treated. Some people tend to refuse medicine because of*  
33  
34 279 *fear of side effects, so when you sensitize them for a long time, they tend to listen and at the end*  
35  
36 280 *the program becomes successful. So avoid short notice messages, people are difficult. They need*  
37  
38 281 *enough time to understand what is happening. (Cluster 21, Men, Malawi)*  
39

40  
41  
42 282 In Malawi, local leaders reported that community members want to be followed up with after distribution  
43  
44 283 to monitor for adverse events or continued engagement with distribution programs to foster trust in  
45  
46 284 future campaigns. Without this, the leaders feared that negative rumors might proliferate, or  
47  
48 285 communities might feel as though they only received treatment for research purposes, rather than for  
49  
50 286 their wellbeing.  
51

52  
53  
54 287 *Intervention complexity: cMDA is complex, but still feasible to implement*  
55  
56  
57  
58  
59  
60

1  
2  
3 288 The CFIR construct of *complexity* is defined as the perceived difficulty of implementing an intervention  
4  
5 289 (17). Across groups, participants were concerned about the timing of cMDA, the distance to distribution  
6  
7 290 sites if cMDA is centrally located as opposed to delivered door-to-door, and whether or not they would  
8  
9  
10 291 have sufficient notice about cMDA before the campaign begins. Many community members suggested  
11  
12 292 optimal distribution times, which varied by site depending on common work schedules and holidays.  
13  
14 293 Concerns regarding health worker/CDD knowledge and accommodation of community members'  
15  
16 294 schedules were prevalent across FGDs but some participants stressed they would change their schedules  
17  
18  
19 295 to be present for distribution if informed by community leaders.

20  
21  
22 296 *Even if someone has a plan to go to the field or to the market, three days before the distribution*  
23  
24 297 *of the drug, they will cancel their plan and come and listen to what the village chief invited them*  
25  
26 298 *to do...if everyone is not informed, it [MDA] cannot succeed. (Cluster 10, Women, Benin)*

27  
28  
29 299 Adults and children across sites recommended that distribution over multiple days within a community to  
30  
31 300 reach the greatest number of people.

32  
33  
34 301 *The period of drug administration should be long so that everyone is able to receive treatment.*  
35  
36 302 *Some people may not be home during the time that you have set to administer the drugs and as*  
37  
38 303 *such if done for maybe only a day, it means those people will not receive the drugs. But if it is for*  
39  
40 304 *some more days then everyone will be treated. (Cluster 21, Men, Malawi)*

41  
42  
43  
44 305

#### 45 46 47 306 **Inner setting**

48  
49 307 *Implementation climate: Initial mistrust of MDA is likely, but demand and perceived need will counter this*

50  
51  
52 308 The CFIR construct *implementation climate* captures comments related to the community member's  
53  
54 309 receptivity to implementation, and the extent to which implementation is supported (17). The core

1  
2  
3 310 component of implementation climate discussed across FGDs were factors that influence community  
4  
5 311 member trust in treatment campaigns. Participants across the sites anticipated high levels of initial  
6  
7 312 mistrust and potential resistance toward newly launched cMDA for STH. This initial mistrust is driven by  
8  
9  
10 313 personal and anecdotal evidence of adverse side-effects such as fatigue, stomachaches, and fever after  
11  
12 314 previous school-based deworming MDA campaigns.

13  
14  
15 315 *Other pupils received the medical treatment before they ate a meal, hence they vomited. So those*  
16  
17 316 *that did not receive the medical treatment were afraid of vomiting too if they took the medicine.*  
18  
19 317 (Cluster 19, Children, Malawi)

20  
21  
22 318 *They will eat [medication] based on the trust. They will eat [medication] based on your approach,*  
23  
24 319 *otherwise they may take and keep it aside somewhere....* (Cluster 17, Men, India)

25  
26  
27 320 In Malawi, limited follow-up by transitory MDA programs and research projects was also noted as fueling  
28  
29 321 mistrust of community health programs. Similarly, in one CDD FGD in India, participants identified mistrust  
30  
31 322 of government programs as a potential barrier to MDA campaigns where medications are provided for  
32  
33 323 free. CDDs explained that community members perceive government provided medications to be of  
34  
35 324 poorer quality and therefore less effective with greater risks of side effects; therefore, those who can  
36  
37 325 afford to purchase their own medications from pharmacies will often do so.

38  
39  
40  
41 326 *For people who can, they will get it [deworming medicine] from the medical shop. Whatever is*  
42  
43 327 *given through the government they will keep it aside and they will not use it.* (Cluster 15, CDD,  
44  
45 328 India)

46  
47  
48  
49 329 In Benin, some participants from the men's, women's, and CDD FGDs shared concerns that drugs used in  
50  
51 330 such campaigns might be given by Westerners with malintent.

1  
2  
3 331 *The majority of the population does not understand. They think that the drugs are poisoned in*  
4  
5 332 *order to reduce the African population. (Cluster 10, Men, Benin)*  
6  
7

8 333 Similarly, in Malawi, CDDs identified rumors and misinformation as major barriers to delivering cMDA with  
9  
10 334 high coverage. Specific rumors include that stool collected for STH surveillance would be used for Satanist  
11  
12 335 practices, rather than medical purposes, and that school-based deworming programs provide  
13  
14 336 contraceptives to young children to reduce population growth.  
15  
16

17  
18 337 While participants noted that mistrust and resistance might initially be high following a transition to cMDA  
19  
20 338 for STH, there was still a strong perceived demand for deworming of all ages, and a sentiment that  
21  
22 339 community sensitization could overcome these concerns.  
23  
24

25 340 *...we are looking forward to this [community-based MDA] and we would like this to be a regular*  
26  
27 341 *treatment. People are suffering from intestinal worms and only children receive the treatment. So*  
28  
29 342 *this project [DeWorm3] will help all of us to receive treatment. (Cluster 21, Men, Malawi)*  
30  
31

32 343 *Compatibility: Community-based MDA is highly compatible with existing health infrastructure*  
33  
34

35 344 The CFIR construct *compatibility* is highly related to *implementation climate*, capturing the alignment  
36  
37 345 between the innovation and existing values and priorities (17). Health facility workers and CDDs across  
38  
39 346 sites noted cMDA should be integrated into existing community programs or, at a minimum, coordinate  
40  
41 347 with ongoing community-based activities to improve treatment coverage and mitigate risks of conflict  
42  
43 348 with ongoing local health programs. CDDs in India and community leaders in Benin identified community-  
44  
45 349 based vitamin A and iron distribution and childhood vaccination campaigns as ideal programs to integrate  
46  
47 350 with cMDA. In India, CDDs also suggested integrating cMDA with existing indoor residual spraying  
48  
49 351 programs for vector control.  
50  
51  
52  
53  
54  
55  
56  
57  
58  
59  
60

1  
2  
3 352 *The voluntary workers who go house to house to spray mosquitoes, we can make use of them to*  
4  
5 353 *give the tablet...Earlier they were going once a month or once a week, but now they go daily house*  
6  
7 354 *to house. We can give through them. (Cluster 17, CDD, India)*  
8  
9

10 355 *Available resources: Training, storage, and hygiene infrastructure are key resources for MDA*  
11  
12  
13 356 *implementation*  
14

15 357 The CFIR construct *available resources* describes the financial and material resources available (and  
16  
17  
18 358 desired) for implementation, including training and education, space, time, and money (17). Health facility  
19  
20 359 workers and CDDs across sites stressed that existing resources may not be sufficient for delivery of cMDA.  
21  
22 360 CDDs in particular were concerned about receiving adequate training and access to resources to take  
23  
24 361 home for self-review. CDDs and health workers highlighted that they wanted more than a single one-day  
25  
26 362 training prior to MDA, in order to provide adequate time to practice and apply skills in a training  
27  
28 363 environment. Across sites, CDDs noted the importance of training before distribution.  
29  
30

31  
32 364 Other key resources identified by CDDs and health workers in Benin included medication storage in the  
33  
34 365 field, community education materials, shelter during inclement weather, as well as food, water, and  
35  
36 366 financial incentives for CDDs. CDDs in Benin were particularly concerned with timely payment for their  
37  
38 367 work. In Malawi, local leaders noted that in the past villagers have felt burdened by volunteering for health  
39  
40 368 program implementation without compensation. They also noted that villagers might expect payment for  
41  
42 369 participating in MDA, given past experiences with research projects providing stipends. In India, health  
43  
44 370 facility workers wanted to ensure they would have adequate staffing to assist during MDA.  
45  
46  
47

48 371 Lastly, CDDs and health center personnel across sites, women in Benin, and leaders in India stressed that  
49  
50 372 hygiene infrastructure needs to be improved and that investing in WASH as part of a broader STH  
51  
52 373 elimination program might, as a result, increase treatment coverage of cMDA by demonstrating long-term  
53  
54 374 investments in community well-being.  
55  
56  
57  
58  
59  
60

1  
2  
3 375 *The rules of hygiene are very important, very, very important. Without it, we cannot right away*  
4  
5 376 *start distributing the drugs and say that we want to completely eradicate the transmission of*  
6  
7 377 *worms, impossible. (CDD, Benin)*  
8  
9

## 10 378 **Characteristics of individuals**

11  
12  
13 379 *Knowledge & beliefs: Skepticism of the clinical rationale for MDA, fear of side effects, and limited perceived*  
14  
15 380 *need for treatment will be barriers to cMDA*  
16  
17

18 381 The *knowledge and beliefs* CFIR construct is defined as individuals' attitudes toward and value placed on  
19  
20 382 implementation and their familiarity with related facts, truths, and principles (17). While participants  
21  
22 383 strongly believed cMDA could eliminate STH transmission, some reservations about MDA rooted in  
23  
24 384 knowledge and perceptions about deworming medications remain. For example, adult men and children  
25  
26 385 in Benin and local leaders in Malawi raised concerns about the effects of treating people who may not be  
27  
28 386 infected with STH.  
29

30  
31  
32 387 *When you get the drugs and you do not have the worms, the tablet can still damage your organs*  
33  
34 388 *such as organs of digestion or breathing. (Cluster 1, Children, Benin)*  
35  
36  
37

38 389 In India and Malawi, participants in the men's FGDs thought individuals who feel healthy might perceive  
39  
40 390 themselves to be at low risk of STH and thus choose not to participate in cMDA. Women in Malawi  
41  
42 391 reported this occurred during prior cMDA campaigns while women in India also noted individuals with  
43  
44 392 limited literacy might not understand the need for treatment and be reluctant to participate in MDA  
45  
46 393 campaigns.  
47  
48

49 394 *Self-efficacy: Community members and CDDs will be key mobilizers for cMDA*  
50  
51

52 395 The CFIR construct *self-efficacy* captures comments that reflect an individual's beliefs in their own abilities  
53  
54 396 to achieve implementation goals (17). Women and community leaders in Benin identified themselves as  
55  
56  
57  
58

397 important catalysts in influencing the acceptability of MDA by working together and influencing their  
398 social networks.

399 *The process is simple as we have just understood, we will also explain to our brothers and sisters*  
400 *who will not accept that treatment is a good thing. We will tell them they should not be*  
401 *discouraged adding that there is good in it. It's up to us to explain to them. (Cluster 1, Women,*  
402 *Benin)*

403 Health facility workers and CDDs also identified themselves as important contributors to ensuring  
404 successful MDA implementation, given their existing relationships with communities.

405 *We worked with them and they know us on the ground to be able to do the job, so there are no*  
406 *issues for community health workers. (CDD, Benin)*

## 408 **Process**

409 *Engaging: Local leaders and sensitization activities are essential for ensuring high treatment coverage*

410 The CFIR construct *engaging* is defined as approaches to attracting and involving individuals in  
411 implementation, such as through social marketing or education campaigns (17). Adult participants across  
412 sites, including local leaders, identified specific leaders as key facilitators of effective implementation  
413 (Table 2). These leaders should be notified in advance of interventions taking place within their  
414 communities to gain their support and promote the intervention prior to implementation. Advance  
415 sensitization with information about the distribution time as well as potential intervention benefits and  
416 risks were identified as critical pieces of information that influence the implementation climate and, in  
417 effect, effective delivery of cMDA. Preferred engagement methods varied slightly across sites, however  
418 community members suggested that a variety of information-sharing mechanisms be utilized in advance  
419 of MDA to improve community member knowledge and buy-in (Table 3).

**Table 3:** Recommendations to optimize the implementation climate for newly launched cMDA

| Recommendation category                                         | Benin                                                                                                                                                                                                                                        | India                                                                                                                                                                                                                                                             | Malawi                                                                                                                              |
|-----------------------------------------------------------------|----------------------------------------------------------------------------------------------------------------------------------------------------------------------------------------------------------------------------------------------|-------------------------------------------------------------------------------------------------------------------------------------------------------------------------------------------------------------------------------------------------------------------|-------------------------------------------------------------------------------------------------------------------------------------|
| <i>MDA distribution mode</i>                                    | Door-to-door distribution                                                                                                                                                                                                                    | Door-to-door distribution preferable; potential for 3-4 central distribution sites in some communities                                                                                                                                                            | Door-to-door distribution                                                                                                           |
| <i>Intervention cost/financial incentives for participation</i> | Free, but need to address rumors about nefarious intentions behind free MDA distribution                                                                                                                                                     | Free treatment preferable to most participants; need to address fears of perceived poor-quality medications provided by government programs. Financial incentives should not be given for MDA participation, but incentives such as combs and soap were suggested | Free, but communities with past exposure to research studies might expect financial incentives for MDA participation                |
| <i>Community drug distributor preferences</i>                   | Health workers (health facility workers or CDDs) who are familiar to community members                                                                                                                                                       | Trained health workers (nurses, doctors, ASHAs) who are familiar. Individuals without training should not be distributors                                                                                                                                         | Health workers (including HSAs) who are familiar to community members. Volunteers are less respected and should not be distributors |
| <i>Duration and time of distribution</i>                        | Distribution over multiple days to accommodate different household schedules and reach the greatest number of people. Rainy season and market days should be avoided. Must consider work schedules and implement flexible distribution times | Distribution over multiple days. Evening or early morning preferred distribution time to accommodate work schedules                                                                                                                                               | Distribution over multiple days to accommodate different household schedules and reach the greatest number of people                |
| <i>Key leaders to engage prior to cMDA</i>                      | Village chiefs, religious leaders, and health workers                                                                                                                                                                                        | President and ward councilor of community (Panchayat), other health workers (Anganwadi workers), and teachers                                                                                                                                                     | Village chiefs, local leaders, religious leaders, local NGOs, HSAs, and teachers                                                    |



|                                                              |                                                                                                                    |                                                                                                                                                                                                  |                                                                                                                                                                |
|--------------------------------------------------------------|--------------------------------------------------------------------------------------------------------------------|--------------------------------------------------------------------------------------------------------------------------------------------------------------------------------------------------|----------------------------------------------------------------------------------------------------------------------------------------------------------------|
| <i>Community education topics to engage MDA participants</i> | Educate community about purpose and potential side effects of treatment                                            | Educate community about purpose, advantages, and potential side effects of treatment, and proper dosage for different people (e.g., children, elders)                                            | Educate community about purpose and potential side effects of treatment; sensitization must be done more than one day in advance to allow decision-making time |
| <i>Mechanisms for engaging community members</i>             | Utilize radio, phones, community meetings, and word of mouth to share information. Ring gongs at distribution time | Utilize radio, loudspeaker announcements, flyers, health documentaries, TV news, community meetings (women's groups), and community dramas to share information. Beat drums at distribution time | Utilize radio, phones, loudspeaker announcements, dramas, community meetings, door-to-door outreach, to share information                                      |

420

421

## 422 DISCUSSION

423 This diagnostic analysis highlights opportunities and challenges of launching cMDA for STH that are shared  
 424 across geographic areas as well as important differences between them. Our findings build upon the  
 425 existing literature and demonstrate strong acceptability of cMDA for STH interruption, particularly as an  
 426 alternative to school-based distribution to provide more equitable access to deworming treatment. When  
 427 considering a transition from school-based distribution to cMDA, participants highlighted opportunities  
 428 to integrate cMDA into existing community health programs, such as vaccination campaigns, and the  
 429 importance of engaging clinically trained, trusted drug distributors to mitigate fears of adverse events and  
 430 increase treatment coverage. Utilizing local CDDs from the same area or are directly known to the  
 431 recipients, is associated with high MDA coverage in other settings. (21, 22) While familiarity was important  
 432 to participants in this study, they also stressed comprehensive clinical training for CDDs as essential for  
 433 fostering trust during cMDA. While participants identified potential benefits of launching cMDA, they also

1  
2  
3 434 noted key barriers that might limit implementation success. Similar to findings from studies exploring  
4  
5 435 MDA barriers post-implementation, the primary barriers identified across sites included mistrust toward  
6  
7 436 free drug distribution (especially those provided by community volunteers perceived to have no clinical  
8  
9 437 training), fear of side effects, and limited perceived need for treatment without symptoms (12, 23-25).  
10  
11 438 This information is essential for adapting interventions to fit the specific context and concerns of  
12  
13 439 communities prior to making a significant change to public health programs, such as changing from school-  
14  
15 440 based delivery to community-wide delivery of deworming medicines.  
16  
17

18  
19 441 In this formative evaluation, we synthesized recommendations from community members to assist in  
20  
21 442 intervention optimization at a site level, including preferred treatment time and distribution methods.  
22  
23 443 Site specific preferences and recommendations for implementation varied to small degrees across  
24  
25 444 settings, including preferred distribution times, campaign duration, location, distributor qualifications,  
26  
27 445 and procedures for engaging leaders and community participants. Other studies have found that  
28  
29 446 proactively identifying specific times when individuals are generally available to receive treatment is an  
30  
31 447 essential facilitator of effective campaign delivery (26-28), and when not completed can increase  
32  
33 448 frustration with community-based volunteer distributors (23) and the MDA campaign itself (29). Where  
34  
35 449 trial timeline and funding allow, formative evaluations such as this may facilitate proactive identification  
36  
37 450 of potential barriers and of implementation processes to optimize community acceptability and adapt  
38  
39 451 intervention delivery as needed. When timelines or funding are limited, like during cMDA implemented  
40  
41 452 by national NTD programs in limited resources settings, brief surveys prior to MDA and interim analyses  
42  
43 453 and may be conducted to tailor MDA implementation.  
44  
45  
46  
47  
48

49 454 Emerging themes from community member, local leader, CDD, and health worker FGDs were highly  
50  
51 455 consistent. However, CDDs and health workers noted unique facilitators and barriers affecting their work,  
52  
53 456 including time for training, resources in the field, and timely compensation, similar feedback from  
54  
55 457 implementers in other settings (24). CDDs, health workers, and community leaders also uniquely stressed  
56  
57  
58  
59

1  
2  
3 458 the importance of packaging WASH interventions with MDA for STH elimination. These sentiments reflect  
4  
5 459 advanced knowledge of STH transmission but may also reflect doubt that transmission interruption  
6  
7 460 programs predicated on broadly delivered MDA will interrupt transmission without also improving  
8  
9 461 hygiene infrastructure. In fact, most of the benefits attributed to cMDA amongst these cadres was driven  
10  
11 462 by beliefs that MDA will be more acceptable when delivered in the community, as opposed to its potential  
12  
13 463 for interrupt transmission. Although evidence regarding the effectiveness of WASH on STH transmission  
14  
15 464 interruption is still weak, it is also important to monitor how implementer and community enthusiasm for  
16  
17 465 cMDA changes over time, potentially driven by the absence of WASH interventions (30).

18  
19  
20  
21 466 Participants across all geographic areas noted that myths and rumors could pose serious challenges to  
22  
23 467 cMDA delivery, adding further to the literature documenting this obstacle in other settings (10, 24, 31,  
24  
25 468 32). Children in Benin and Malawi noted specific concerns about side effects of deworming treatment  
26  
27 469 circulating within schools prior to and post-MDA campaigns. While side effects for albendazole are  
28  
29 470 typically quite mild, albendazole is often co-administered to children with praziquantel as preventative  
30  
31 471 chemotherapy for schistosomiasis. Praziquantel can cause relatively more severe side effects, including  
32  
33 472 diarrhea and vomiting (33). Thus, prior experiences with MDA campaigns including other treatments  
34  
35 473 might influence future perceptions about albendazole specifically or MDA generally (34). Evidence  
36  
37 474 suggests that effective health workers can overcome these individual-level perceptions (29); addressing  
38  
39 475 myths and rumors will require targeted and pro-active community sensitization and CDD training that  
40  
41 476 openly discuss local myths and rumors pre-intervention.

42  
43  
44  
45  
46  
47 477 Mistrust toward public health campaigns and government-run health programs was prevalent across  
48  
49 478 settings. These concerns were driven by prior negative experiences with medical interventions and  
50  
51 479 programs in which limited information was provided in advance of treatment, parents were minimally  
52  
53 480 engaged in school-based MDA, and there were perceived concerns about drug quality. Potential strategies  
54  
55 481 for overcoming these barriers include engaging local leaders (27, 31, 35), targeted education campaigns

1  
2  
3 482 (24, 36, 37), community mobilization (35, 38, 39), and engagement of trusted, trained personnel to  
4  
5 483 administer preventive treatment.  
6  
7

8 484 During the design of our initial question guide (Appendix 1), we drew from selected constructs across all  
9  
10 485 CFIR domains. However, during data analysis no constructs within the outer setting emerged as major  
11  
12 486 facilitators or barriers to launch of cMDA campaigns. The outer setting domain is comprised of constructs  
13  
14 487 representing external influences on implementation and, perhaps because these data were collected at  
15  
16 488 the community-level, respondents were more focused on individuals involved in implementation and  
17  
18 489 implementation processes (17). Additionally, while CFIR constructs should ideally be coupled to specific  
19  
20 490 targeted outcomes, the formative nature of this study precludes linkage of implementation determinants  
21  
22 491 to outcomes (18).  
23  
24  
25  
26

## 27 492 **Conclusion**

28  
29  
30 493 This study supports that cMDA, particularly as an alternative to school-based MDA, is generally acceptable  
31  
32 494 across heterogenous settings and builds upon the existing literature exploring facilitators and barriers of  
33  
34 495 launching and implementing cMDA. Community engagement including STH education, understanding  
35  
36 496 preferred distribution times and methods, involvement of local leaders and familiar health workers or  
37  
38 497 CDDs are critical for implementation success. Potential barriers, including mistrust of free drug  
39  
40 498 distribution, fear of side effects, and limited perceived need of treatment can be addressed through  
41  
42 499 community sensitization and engagement of local leaders and trusted health workers. Formative research  
43  
44 500 exploring attitudes and community-derived recommendations should be conducted when possible to  
45  
46 501 improve community acceptability of new interventions.  
47  
48  
49

## 50 502 **Author contributions**

51  
52  
53 503 ARM, JLW, MCGC, SSRA, KK, and MI conceived of the initial study design. EA, RR, SPK, FC, CIT, PN, MI, KK,  
54  
55 504 KA, AT, and YJ were involved in data collection and data processing. AR managed the data. AR, ABE, SL,  
56  
57  
58  
59

1  
2  
3 505 and ARM contributed to data analysis. SL, EA, and AM led the writing of the paper. All authors read and  
4  
5 506 approved the final version of the manuscript.  
6  
7

### 8 507 **Competing Interests**

9  
10  
11 508 None declared.  
12  
13

### 14 509 **Funding statement**

15  
16  
17 510 The DeWorm3 study was funded by the Bill & Melinda Gates Foundation  
18  
19 511 (<https://www.gatesfoundation.org/>) and (grant number OPP1129535). The funders had no role in study  
20  
21 512 design, data collection and analysis, decision to publish, or preparation of the manuscript.  
22  
23

### 24 513 **Data availability**

25  
26  
27 514 Data are available from the DeWorm3 Institutional Data Access Committee (contact [dw3data@uw.edu](mailto:dw3data@uw.edu))  
28  
29 515 for researchers who meet criteria for data access.  
30  
31

### 32 516 **Acknowledgements**

33  
34  
35 517 The authors wish to thank all of the study participants, communities and community leaders, national NTD  
36  
37 518 program staff and other local, regional and national partners who have participated or supported the  
38  
39 519 DeWorm3 study. We also would like to acknowledge the work of all members of the DeWorm3 study  
40  
41 520 teams and affiliated institutions. We give special thanks to Rachel Geyer, Elodie Yard, and Mira Emmanuel-  
42  
43 521 Fabula for contributions to data collection, management, or analysis. We thank Rajeshkumar Rajendran,  
44  
45 522 Surya Kulasekaran and Chinnaduraipandi Paulsamy for their support in data collection in the field sites in  
46  
47 523 India. We also thank Adolphe Kpatchavi, Roch Houngnihan and Abdoulaye Benon Monra for their support  
48  
49 524 during the training of surveyors in the Benin site.  
50  
51  
52  
53

54 525  
55  
56  
57  
58  
59  
60

## References

1. Hotez PJ, Molyneux DH, Fenwick A, Kumaresan J, Sachs SE, Sachs JD, et al. Control of neglected tropical diseases. *New England Journal of Medicine*. 2007;357(10):1018-27.
2. Jamison D, Breman J, Measham A, Alleyne G, Claeson M, Evans D, et al. Helminth Infections: Soil-transmitted Helminth Infections and Schistosomiasis--Disease Control Priorities in Developing Countries. 2006.
3. (WHO) WHO. Guideline on when to start antiretroviral therapy and on pre-exposure prophylaxis for HIV. 2015.
4. Brooker SJ, Nikolay B, Balabanova D, Pullan RL. Global feasibility assessment of interrupting the transmission of soil-transmitted helminths: a statistical modelling study. *The Lancet infectious diseases*. 2015;15(8):941-50.
5. Pullan RL, Halliday KE, Oswald WE, Mcharo C, Beaumont E, Kepha S, et al. Effects, equity, and cost of school-based and community-wide treatment strategies for soil-transmitted helminths in Kenya: a cluster-randomised controlled trial. *The Lancet*. 2019;393(10185):2039-50.
6. Lo NC, Bogoch II, Blackburn BG, Raso G, N'Goran EK, Coulibaly JT, et al. Comparison of community-wide, integrated mass drug administration strategies for schistosomiasis and soil-transmitted helminthiasis: a cost-effectiveness modelling study. *The Lancet Global Health*. 2015;3(10):e629-e38.
7. Farrell SH, Truscott JE, Anderson RM. The importance of patient compliance in repeated rounds of mass drug administration (MDA) for the elimination of intestinal helminth transmission. *Parasites & vectors*. 2017;10(1):291.
8. Shuford KV, Turner HC, Anderson RM. Compliance with anthelmintic treatment in the neglected tropical diseases control programmes: a systematic review. *Parasites & vectors*. 2016;9(1):29.

- 1  
2  
3 9. Yajima A, Mikhailov A, Mbabazi PS, Gabrielli AF, Minchiotti S, Montresor A, et al. Preventive  
4  
5  
6  
7  
8  
9  
10  
11  
12  
13  
14  
15  
16  
17  
18  
19  
20  
21  
22  
23  
24  
25  
26  
27  
28  
29  
30  
31  
32  
33  
34  
35  
36  
37  
38  
39  
40  
41  
42  
43  
44  
45  
46  
47  
48  
49  
50  
51  
52  
53  
54  
55  
56  
57  
58  
59  
60
10. Krentel A, Fischer PU, Weil GJ. A review of factors that influence individual compliance with mass  
drug administration for elimination of lymphatic filariasis. *PLoS Negl Trop Dis*. 2013;7(11):e2447.
11. Gyapong JO, Owusu IO, Vroom FBd-C, Mensah EO, Gyapong M. Elimination of lymphatic filariasis:  
current perspectives on mass drug administration. *Research and reports in tropical medicine*. 2018;9:25.
12. Silumbwe A, Halwindi H, Zulu JM. How community engagement strategies shape participation in  
mass drug administration programmes for lymphatic filariasis: The case of Luangwa District, Zambia. *PLoS  
Negl Trop Dis*. 2019;13(11):e0007861.
13. Lugtenberg M, Burgers J, Westert G. Effects of evidence-based clinical practice guidelines on  
quality of care: a systematic review. *BMJ Quality & Safety*. 2009;18(5):385-92.
14. Ásbjörnsdóttir KH, Ajjampur SSR, Anderson RM, Bailey R, Gardiner I, Halliday KE, et al. Assessing  
the feasibility of interrupting the transmission of soil-transmitted helminths through mass drug  
administration: The DeWorm3 cluster randomized trial protocol. *PLoS neglected tropical diseases*.  
2018;12(1).
15. Curran GM, Bauer M, Mittman B, Pyne JM, Stetler C. Effectiveness-implementation hybrid  
designs: combining elements of clinical effectiveness and implementation research to enhance public  
health impact. *Medical care*. 2012;50(3):217.
16. Means AR, Ajjampur SS, Bailey R, Galactionova K, Gwayi-Chore M-C, Halliday K, et al. Evaluating  
the sustainability, scalability, and replicability of an STH transmission interruption intervention: The  
DeWorm3 implementation science protocol. *PLoS neglected tropical diseases*. 2018;12(1):e0005988.

- 1  
2  
3 17. Damschroder LJ, Aron DC, Keith RE, Kirsh SR, Alexander JA, Lowery JC. Fostering implementation  
4 of health services research findings into practice: a consolidated framework for advancing implementation  
5 science. *Implement Sci.* 2009;4:50.  
6  
7
- 8  
9 18. Kirk MA, Kelley C, Yankey N, Birken SA, Abadie B, Damschroder L. A systematic review of the use  
10 of the consolidated framework for implementation research. *Implementation Science.* 2015;11(1):72.  
11  
12
- 13  
14 19. Cassell C, Symon G. *Essential guide to qualitative methods in organizational research*: Sage; 2004.  
15
- 16  
17 20. Nowell LS, Norris JM, White DE, Moules NJ. Thematic analysis: Striving to meet the  
18 trustworthiness criteria. *International Journal of Qualitative Methods.* 2017;16(1):1609406917733847.  
19  
20
- 21  
22 21. Babu BV, Satyanarayana K. Factors responsible for coverage and compliance in mass drug  
23 administration during the programme to eliminate lymphatic filariasis in the East Godavari District, South  
24 India. *Trop Doct.* 2003;33(2):79-82.  
25  
26
- 27  
28 22. Gunawardena S, Ismail M, Bradley M, Karunaweera N. Factors influencing drug compliance in the  
29 mass drug administration programme against filariasis in the Western province of Sri Lanka. *Transactions*  
30 *of the Royal Society of Tropical Medicine and Hygiene.* 2007;101(5):445-53.  
31  
32
- 33  
34 23. Ahorlu CSK, Koka E, Adu-Amankwah S, Otchere J, de Souza DK. Community perspectives on  
35 persistent transmission of lymphatic filariasis in three hotspot districts in Ghana after 15 rounds of mass  
36 drug administration: a qualitative assessment. *BMC public health.* 2018;18(1):238.  
37  
38
- 39  
40 24. Legge H, Kepha S, Prochazka M, Halliday K, Pullan R, Gwayi-Chore MC, et al. Implementer and  
41 recipient perspectives of community-wide mass drug administration for soil-transmitted helminths in  
42 Kwale County, Kenya. *PLoS Negl Trop Dis.* 2020;14(4):e0008258.  
43  
44
- 45  
46 25. Babu BV, Mishra S. Mass drug administration under the programme to eliminate lymphatic  
47 filariasis in Orissa, India: a mixed-methods study to identify factors associated with compliance and non-  
48 compliance. *Transactions of the Royal Society of Tropical Medicine and Hygiene.* 2008;102(12):1207-13.  
49  
50  
51  
52  
53  
54  
55  
56  
57  
58  
59



- 1  
2  
3 26. Dial NJ, Ceesay SJ, Gosling RD, D'Alessandro U, Baltzell KA. A qualitative study to assess  
4 community barriers to malaria mass drug administration trials in The Gambia. *Malaria Journal*.  
5  
6 2014;13(1):47.  
7  
8  
9  
10 27. Wanzira H, Naiga S, Mulebeke R, Bukenya F, Nabukenya M, Omoding O, et al. Community  
11 facilitators and barriers to a successful implementation of mass drug administration and indoor residual  
12 spraying for malaria prevention in Uganda: a qualitative study. *Malar J*. 2018;17(1):474.  
13  
14  
15  
16 28. Lahariya C, Mishra A. Strengthening of mass drug administration implementation is required to  
17 eliminate lymphatic filariasis from India: an evaluation study. *J Vector Borne Dis*. 2008;45(4):313-20.  
18  
19  
20  
21 29. Kisoka WJ, Simonsen PE, Malecela MN, Tersbøl BP, Mushi DL, Meyrowitsch DW. Factors  
22 influencing drug uptake during mass drug administration for control of lymphatic filariasis in rural and  
23 urban Tanzania. *PLoS One*. 2014;9(10):e109316.  
24  
25  
26  
27  
28 30. Nery SV, Pickering AJ, Abate E, Asmare A, Barrett L, Benjamin-Chung J, et al. The role of water,  
29 sanitation and hygiene interventions in reducing soil-transmitted helminths: interpreting the evidence  
30 and identifying next steps. *Parasites & vectors*. 2019;12(1):273.  
31  
32  
33  
34 31. Gyapong JO, Owusu IO, da-Costa Vroom FB, Mensah EO, Gyapong M. Elimination of lymphatic  
35 filariasis: current perspectives on mass drug administration. *Res Rep Trop Med*. 2018;9:25-33.  
36  
37  
38  
39 32. Kisoka WJ, Tersbol BP, Meyrowitsch DW, Simonsen PE, Mushi DL. Community Members'  
40 Perceptions of Mass Drug Administration for Control of Lymphatic Filariasis in Rural and Urban Tanzania.  
41  
42  
43  
44  
45  
46 33. Sousa-Figueiredo JC, Pleasant J, Day M, Betson M, Rollinson D, Montresor A, et al. Treatment of  
47 intestinal schistosomiasis in Ugandan preschool children: best diagnosis, treatment efficacy and side-  
48 effects, and an extended praziquantel dosing pole. *International Health*. 2010;2(2):103-13.  
49  
50  
51  
52  
53  
54  
55  
56  
57  
58  
59

- 1  
2  
3 34. Musuva RM, Matey E, Masaku J, Odhiambo G, Mwendu F, Thuita I, et al. Lessons from  
4 implementing mass drug administration for soil transmitted helminths among pre-school aged children  
5 during school based deworming program at the Kenyan coast. BMC public health. 2017;17(1):575.  
6  
7  
8  
9  
10 35. Omedo MO, Matey EJ, Awiti A, Ogutu M, Alaii J, Karanja DM, et al. Community health workers'  
11 experiences and perspectives on mass drug administration for schistosomiasis control in western Kenya:  
12 the SCORE Project. The American journal of tropical medicine and hygiene. 2012;87(6):1065-72.  
13  
14  
15  
16 36. Cantey PT, Rout J, Rao G, Williamson J, Fox LM. Increasing compliance with mass drug  
17 administration programs for lymphatic filariasis in India through education and lymphedema  
18 management programs. PLoS Negl Trop Dis. 2010;4(6):e728.  
19  
20  
21  
22  
23 37. Garfield RM, Vermund SH. Health education and community participation in mass drug  
24 administration for malaria in Nicaragua. Social Science & Medicine. 1986;22(8):869-77.  
25  
26  
27  
28 38. De Martin S, Von Seidlein L, Deen JL, Pinder M, Walraven G, Greenwood B. Community  
29 perceptions of a mass administration of an antimalarial drug combination in The Gambia. Tropical  
30 Medicine & International Health. 2001;6(6):442-8.  
31  
32  
33  
34 39. Mulugeta A, Gebregergs GB, Asfaw S, Yemane D, Mitiku M, Meresa B, et al. Coverage, social  
35 mobilization and challenges of mass Zithromax administration campaign in South and South East zones of  
36 Tigray, Northern Ethiopia: A cross sectional study. PLoS neglected tropical diseases. 2018;12(2):e0006288.  
37  
38  
39  
40  
41  
42  
43  
44  
45  
46  
47  
48  
49  
50  
51  
52  
53  
54  
55  
56  
57  
58  
59  
60

## Appendix 1. Qualitative interview guides

### Interview guide #1: Health Centre & DeWorm3 Supervisory Teams

|    | Question                                                                                                                                                                                                                                                                                                                                                 |
|----|----------------------------------------------------------------------------------------------------------------------------------------------------------------------------------------------------------------------------------------------------------------------------------------------------------------------------------------------------------|
| 1  | What kind of information or evidence are you aware of that shows whether or not community-wide MDA for interrupting transmission of STH will work in your setting?                                                                                                                                                                                       |
| 2  | <p><i>Follow-up questions:</i></p> <ul style="list-style-type: none"> <li>• <i>Is this evidence strong or weak?</i></li> <li>• <i>What evidence are you aware of from your own research? Practice guidelines? Published literature? Other settings?</i></li> <li>• <i>How does this knowledge affect your perception of the intervention?</i></li> </ul> |
| 3  | What advantages does community-wide MDA for STH have compared to school-age targeted programs? What disadvantages?                                                                                                                                                                                                                                       |
| 4  | When delivering community-wide MDA for STH, what local adaptations should be made so that the intervention is effective?                                                                                                                                                                                                                                 |
| 5  | <p><i>Follow-up questions:</i></p> <ul style="list-style-type: none"> <li>• <i>What aspects of the intervention should not be adapted?</i></li> <li>• <i>Do you think you will be able to make these adaptations? Why or why not?</i></li> </ul>                                                                                                         |
| 6  | How complicated is delivery of the entire community-wide MDA for STH intervention? Please consider the following aspects of the intervention: duration of an MDA round, target population, and number of steps and sub-activities involved to fully implement.                                                                                           |
| 7  | What supportive materials or tools are needed to ensure effective implementation of community-wide MDA for STH?                                                                                                                                                                                                                                          |
| 8  | What community-wide MDA for STH activities are built upon the previous LF MDA program infrastructure and experiences?                                                                                                                                                                                                                                    |
| 9  | <p><i>Follow-up questions:</i></p> <ul style="list-style-type: none"> <li>• <i>If none, what LF program activities could be leveraged for community-wide MDA for STH?</i></li> </ul>                                                                                                                                                                     |
| 10 | From your perspective, what are unique costs of implementing community-wide MDA for STH, relative to the standard of care of school-age targeted MDA?                                                                                                                                                                                                    |
| 11 | What barriers might community members face in participating in community-wide MDA for STH?                                                                                                                                                                                                                                                               |
| 12 | <p><i>Follow-up question:</i></p> <ul style="list-style-type: none"> <li>• <i>What could be done to overcome these barriers?</i></li> </ul>                                                                                                                                                                                                              |
| 13 | What kinds of infrastructure changes to the health system will be needed to accommodate community-wide MDA for STH?                                                                                                                                                                                                                                      |
| 14 | <p><i>Follow-up questions:</i></p>                                                                                                                                                                                                                                                                                                                       |

|    | Question                                                                                                                                                                                                                                                                                                                                                                                                                                                                                                           |
|----|--------------------------------------------------------------------------------------------------------------------------------------------------------------------------------------------------------------------------------------------------------------------------------------------------------------------------------------------------------------------------------------------------------------------------------------------------------------------------------------------------------------------|
|    | <ul style="list-style-type: none"> <li>• <i>If community-wide MDA for STH is scaled-up after the DeWorm3 project, will there need to be any changes in formal policies? Changes in information systems or data reporting systems? Other?</i></li> <li>• <i>What kind of approvals do you think will be needed to transition the STH program entirely to community-wide MDA? Who will need to be involved?</i></li> <li>• <i>Can you describe the process that will be needed to make these changes?</i></li> </ul> |
| 10 | How accepting are your co-workers of implementing community-wide MDA for STH? Why?                                                                                                                                                                                                                                                                                                                                                                                                                                 |
| 11 | <p>Do you think community-wide MDA for STH could be integrated into routine MOH programs?</p> <p><i>Follow-up questions:</i></p> <ul style="list-style-type: none"> <li>• <i>If yes, how? If no, why not?</i></li> <li>• <i>What would the effects of integration on routine programs be?</i></li> </ul>                                                                                                                                                                                                           |
| 12 | How important do you think it is to implement community-wide MDA for STH compared to the other health priorities?                                                                                                                                                                                                                                                                                                                                                                                                  |
| 13 | Do you feel incentivized to ensure that the DeWorm3 trial is successful in interrupting transmission of STH? What is the incentive?                                                                                                                                                                                                                                                                                                                                                                                |
| 14 | <p>How supportive are government and non-governmental leadership of implementing community-wide MDA for STH?</p> <p><i>Follow-up question:</i></p> <ul style="list-style-type: none"> <li>• <i>How do you think it will affect uptake/implementation?</i></li> </ul>                                                                                                                                                                                                                                               |
| 15 | <p>What kind of relevant training will you have during this intervention? Do you feel the training will prepare you to carry out the roles and responsibilities expected of you? How so?</p> <p><i>Follow-up questions:</i></p> <ul style="list-style-type: none"> <li>• <i>What are the positive aspects of the training?</i></li> <li>• <i>What is missing?</i></li> <li>• <i>What kind of continued training is necessary?</i></li> </ul>                                                                       |
| 16 | Do you think that community-wide MDA could interrupt STH transmission (i.e. stop the spread of intestinal worms) in your setting? Why or why not?                                                                                                                                                                                                                                                                                                                                                                  |
| 17 | How confident are you that you will be able to successfully carry out your DeWorm3 related duties? What gives you that level of confidence (or lack of confidence)?                                                                                                                                                                                                                                                                                                                                                |
| 18 | <p>Can you describe your team's plan for implementing community-wide MDA for STH?</p> <p><i>Follow-up questions:</i></p> <ul style="list-style-type: none"> <li>• <i>Do you think everyone involved understands the plan well, or is it too complicated?</i></li> <li>• <i>What do you do if you have to modify or revise the plan due to challenges, errors, or mistakes?</i></li> </ul>                                                                                                                          |
| 19 | Who are the key influential individuals or organizations to get buy-in from during the DeWorm3 study?                                                                                                                                                                                                                                                                                                                                                                                                              |

|    | Question                                                                                                            |
|----|---------------------------------------------------------------------------------------------------------------------|
| 20 | How should community members be informed about community-wide MDA or other DeWorm3 interventions before they occur? |
| 21 | What are some strategies to achieve high MDA treatment coverage?                                                    |
| 22 | Is there any other information that you would like to share about community-wide MDA today?                         |

## Interview Guide #2: Community Drug Distributors & Community Health Workers

| #  | Question                                                                                                                                                                                                                                                                                                                                                |
|----|---------------------------------------------------------------------------------------------------------------------------------------------------------------------------------------------------------------------------------------------------------------------------------------------------------------------------------------------------------|
| 1  | What advantages does community-wide MDA for STH have compared to school-age targeted programs? What disadvantages?                                                                                                                                                                                                                                      |
| 2  | When delivering community-wide MDA for STH, what local adaptations should be made so that the intervention is effective?<br><i>Follow-up questions:</i> <ul style="list-style-type: none"> <li>• What aspects of the intervention should not be adapted?</li> <li>• Do you think you will be able to make these adaptations? Why or why not?</li> </ul> |
| 3  | How complicated is delivery of the entire community-wide MDA for STH intervention? Please consider the following aspects of the intervention: duration of an MDA round, target population, and number of steps and sub-activities involved to fully implement.                                                                                          |
| 4  | What supportive materials or tools are needed to ensure effective implementation of community-wide MDA for STH?                                                                                                                                                                                                                                         |
| 5  | From your perspective, what are unique costs of implementing community-wide MDA for STH, relative to the standard of care of school-age targeted MDA?                                                                                                                                                                                                   |
| 6  | What barriers might community members face in participating in community-wide MDA for STH?<br><i>Follow-up question:</i> <ul style="list-style-type: none"> <li>• What could be done to overcome these barriers?</li> </ul>                                                                                                                             |
| 10 | How accepting are your co-workers of implementing community-wide MDA for STH? Why?                                                                                                                                                                                                                                                                      |
| 11 | Do you think community-wide MDA for STH could be integrated into routine MOH programs?<br><i>Follow-up questions:</i> <ul style="list-style-type: none"> <li>• If yes, how? If no, why not?</li> <li>• What would the effects of integration on routine programs be?</li> </ul>                                                                         |
| 12 | How important do you think it is to implement community-wide MDA for STH compared to the other health priorities?                                                                                                                                                                                                                                       |
| 13 | Do you feel incentivized to ensure that the DeWorm3 trial is successful in interrupting transmission of STH? What is the incentive?                                                                                                                                                                                                                     |
| 14 | How supportive are government and non-governmental leadership of implementing community-wide MDA for STH?                                                                                                                                                                                                                                               |

| #  | Question                                                                                                                                                                                                                                                                                                                                                                                                                                     |
|----|----------------------------------------------------------------------------------------------------------------------------------------------------------------------------------------------------------------------------------------------------------------------------------------------------------------------------------------------------------------------------------------------------------------------------------------------|
|    | <p><i>Follow-up question:</i></p> <ul style="list-style-type: none"> <li>• <i>How do you think it will affect uptake/implementation?</i></li> </ul>                                                                                                                                                                                                                                                                                          |
| 15 | <p>What kind of relevant training will you have during this intervention? Do you feel the training will prepare you to carry out the roles and responsibilities expected of you? How so?</p> <p><i>Follow-up questions:</i></p> <ul style="list-style-type: none"> <li>• <i>What are the positive aspects of the training?</i></li> <li>• <i>What is missing?</i></li> <li>• <i>What kind of continued training is necessary?</i></li> </ul> |
| 16 | Do you think that community-wide MDA could interrupt STH transmission (i.e. stop the spread of intestinal worms) in your setting? Why or why not?                                                                                                                                                                                                                                                                                            |
| 17 | How confident are you that you will be able to successfully carry out your DeWorm3 related duties? What gives you that level of confidence (or lack of confidence)?                                                                                                                                                                                                                                                                          |
| 18 | <p>Can you describe your team's plan for implementing community-wide MDA for STH?</p> <p><i>Follow-up questions:</i></p> <ul style="list-style-type: none"> <li>• <i>Do you think everyone involved understands the plan well, or is it too complicated?</i></li> <li>• <i>What do you do if you have to modify or revise the plan due to challenges, errors, or mistakes?</i></li> </ul>                                                    |
| 19 | Who are the key influential individuals or organizations to get buy-in from during the DeWorm3 study?                                                                                                                                                                                                                                                                                                                                        |
| 20 | How should community members be informed about community-wide MDA or other DeWorm3 interventions before they occur?                                                                                                                                                                                                                                                                                                                          |
| 21 | What are some strategies to achieve high MDA treatment coverage?                                                                                                                                                                                                                                                                                                                                                                             |
| 22 | Is there any other information that you would like to share about community-wide MDA today?                                                                                                                                                                                                                                                                                                                                                  |

### Interview Guide #3: Community members

| # | Question                                                                                                                                                                                                                                                                             |
|---|--------------------------------------------------------------------------------------------------------------------------------------------------------------------------------------------------------------------------------------------------------------------------------------|
| 1 | <p>What advantages does community-wide MDA for STH have compared to school-age targeted programs?</p> <p><i>Follow-up question:</i></p> <ul style="list-style-type: none"> <li>• <i>What disadvantages?</i></li> </ul>                                                               |
| 2 | <p>When delivering community-wide MDA for STH, what local adaptations should be made so that the intervention is effective?</p> <p><i>Follow-up question:</i></p> <ul style="list-style-type: none"> <li>• <i>What aspects of the intervention should not be adapted?</i></li> </ul> |

| # | Question                                                                                                                                                                                                                                                                                                                                                                                                                                                                                                        |
|---|-----------------------------------------------------------------------------------------------------------------------------------------------------------------------------------------------------------------------------------------------------------------------------------------------------------------------------------------------------------------------------------------------------------------------------------------------------------------------------------------------------------------|
| 3 | <p>What barriers might community members face in participating in community-wide MDA for STH?</p> <p><i>Follow-up question:</i></p> <ul style="list-style-type: none"> <li>• <i>What could be done to overcome these barriers?</i></li> </ul>                                                                                                                                                                                                                                                                   |
| 4 | <p>Do you remember the lymphatic filariasis (LF) MDA programs that used to occur in this area? What do you remember about them?</p> <p><i>Follow-up questions:</i></p> <ul style="list-style-type: none"> <li>• <i>What could be done to overcome these barriers?</i></li> <li>• <i>Did you participate in those treatment days by swallowing the medicines given to you? Why or why not?</i></li> <li>• <i>Has that affected your interest in participating in the current mass treatment days?</i></li> </ul> |
| 5 | <p>Do you think that community-wide MDA could interrupt STH transmission (i.e. stop the spread of intestinal worms) in your setting? Why or why not?</p>                                                                                                                                                                                                                                                                                                                                                        |
| 6 | <p>Who are the key influential individuals or organizations to get buy-in from during the DeWorm3 study?</p> <p><i>Follow-up questions:</i></p> <ul style="list-style-type: none"> <li>• <i>Can you provide specific examples of why you think their buy-in is important?</i></li> </ul>                                                                                                                                                                                                                        |
| 7 | <p>How should community members be informed about community-wide MDA or other DeWorm3 interventions before they occur?</p>                                                                                                                                                                                                                                                                                                                                                                                      |
| 8 | <p>What are some strategies to achieve high MDA treatment coverage?</p>                                                                                                                                                                                                                                                                                                                                                                                                                                         |
| 9 | <p>Is there any other information that you would like to share about community-wide MDA today?</p>                                                                                                                                                                                                                                                                                                                                                                                                              |

# BMJ Open

## "It depends on how you tell": A qualitative diagnostic analysis of the implementation climate for community-wide mass drug administration for soil-transmitted helminths

|                                 |                                                                                                                                                                                                                                                                                                                                                                                                                                                                                                                                                                                                                                                                                                                                                                                                                                                                                                                                                                                                                                                                                                                                                                                                                                                                                                                                                                                                                                              |
|---------------------------------|----------------------------------------------------------------------------------------------------------------------------------------------------------------------------------------------------------------------------------------------------------------------------------------------------------------------------------------------------------------------------------------------------------------------------------------------------------------------------------------------------------------------------------------------------------------------------------------------------------------------------------------------------------------------------------------------------------------------------------------------------------------------------------------------------------------------------------------------------------------------------------------------------------------------------------------------------------------------------------------------------------------------------------------------------------------------------------------------------------------------------------------------------------------------------------------------------------------------------------------------------------------------------------------------------------------------------------------------------------------------------------------------------------------------------------------------|
| Journal:                        | <i>BMJ Open</i>                                                                                                                                                                                                                                                                                                                                                                                                                                                                                                                                                                                                                                                                                                                                                                                                                                                                                                                                                                                                                                                                                                                                                                                                                                                                                                                                                                                                                              |
| Manuscript ID                   | bmjopen-2022-061682.R1                                                                                                                                                                                                                                                                                                                                                                                                                                                                                                                                                                                                                                                                                                                                                                                                                                                                                                                                                                                                                                                                                                                                                                                                                                                                                                                                                                                                                       |
| Article Type:                   | Original research                                                                                                                                                                                                                                                                                                                                                                                                                                                                                                                                                                                                                                                                                                                                                                                                                                                                                                                                                                                                                                                                                                                                                                                                                                                                                                                                                                                                                            |
| Date Submitted by the Author:   | 11-May-2022                                                                                                                                                                                                                                                                                                                                                                                                                                                                                                                                                                                                                                                                                                                                                                                                                                                                                                                                                                                                                                                                                                                                                                                                                                                                                                                                                                                                                                  |
| Complete List of Authors:       | Avokpaho, Euripide; Institut de Recherche Clinique du Benin<br>Lawrence, Sarah; University of Washington, Pediatrics<br>Roll, Amy; University of Washington, Department of Global Health<br>Titus, Angelin; Christian Medical College Vellore<br>Jacob, Yesudoss; Christian Medical College Vellore<br>PUTHUPALAYAM KALIAPPAN, SARAVANAKUMAR; Christian Medical College Vellore, Division of Gastrointestinal Sciences<br>Gwayi-Chore, Marie Claire; University of Washington, Department of Global Health; The DeWorm3 Project<br>Chabi, Félicien; Institut de Recherche Clinique du Bénin<br>Togbevi, Comlanvi; Institut de Recherche Clinique du Bénin<br>Elijan, Abiguel Belou; Institut de Recherche Clinique du Bénin<br>Nindi, Providence; Blantyre Institute for Community Outreach<br>Walson, Judd L; University of Washington, Department of Global Health; The DeWorm3 Project<br>Ajjampur, Sitara; Christian Medical College Vellore, The Wellcome Trust Reseach Laboratory, Division of Gastrointestinal Sciences<br>Ibikounle, Moudachirou; Institut de Recherche Clinique du Benin; Universite d'Abomey-Calavi, Centre de Recherche pour la lutte contre les Maladies Infectieuses Tropicales (CReMIT/TIDRC)<br>Kalua, Khumbo; Blantyre Institute for Community Outreach<br>Aruldas, Kumudha; Christian Medical College Vellore<br>Means, Arianna; University of Washington, Department of Global Health; The DeWorm3 Project |
| <b>Primary Subject Heading</b>: | Global health                                                                                                                                                                                                                                                                                                                                                                                                                                                                                                                                                                                                                                                                                                                                                                                                                                                                                                                                                                                                                                                                                                                                                                                                                                                                                                                                                                                                                                |
| Secondary Subject Heading:      | Public health                                                                                                                                                                                                                                                                                                                                                                                                                                                                                                                                                                                                                                                                                                                                                                                                                                                                                                                                                                                                                                                                                                                                                                                                                                                                                                                                                                                                                                |
| Keywords:                       | Public health < INFECTIOUS DISEASES, Tropical medicine < INFECTIOUS DISEASES, Community child health < PAEDIATRICS, QUALITATIVE RESEARCH                                                                                                                                                                                                                                                                                                                                                                                                                                                                                                                                                                                                                                                                                                                                                                                                                                                                                                                                                                                                                                                                                                                                                                                                                                                                                                     |
|                                 |                                                                                                                                                                                                                                                                                                                                                                                                                                                                                                                                                                                                                                                                                                                                                                                                                                                                                                                                                                                                                                                                                                                                                                                                                                                                                                                                                                                                                                              |



1  
2  
3  
4  
5  
6  
7  
8  
9  
10  
11  
12  
13  
14  
15  
16  
17  
18  
19  
20  
21  
22  
23  
24  
25  
26  
27  
28  
29  
30  
31  
32  
33  
34  
35  
36  
37  
38  
39  
40  
41  
42  
43  
44  
45  
46  
47  
48  
49  
50  
51  
52  
53  
54  
55  
56  
57  
58  
59  
60

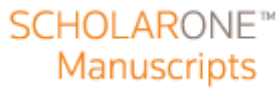



I, the Submitting Author has the right to grant and does grant on behalf of all authors of the Work (as defined in the below author licence), an exclusive licence and/or a non-exclusive licence for contributions from authors who are: i) UK Crown employees; ii) where BMJ has agreed a CC-BY licence shall apply, and/or iii) in accordance with the terms applicable for US Federal Government officers or employees acting as part of their official duties; on a worldwide, perpetual, irrevocable, royalty-free basis to BMJ Publishing Group Ltd ("BMJ") its licensees and where the relevant Journal is co-owned by BMJ to the co-owners of the Journal, to publish the Work in this journal and any other BMJ products and to exploit all rights, as set out in our [licence](#).

The Submitting Author accepts and understands that any supply made under these terms is made by BMJ to the Submitting Author unless you are acting as an employee on behalf of your employer or a postgraduate student of an affiliated institution which is paying any applicable article publishing charge ("APC") for Open Access articles. Where the Submitting Author wishes to make the Work available on an Open Access basis (and intends to pay the relevant APC), the terms of reuse of such Open Access shall be governed by a Creative Commons licence – details of these licences and which [Creative Commons](#) licence will apply to this Work are set out in our licence referred to above.

Other than as permitted in any relevant BMJ Author's Self Archiving Policies, I confirm this Work has not been accepted for publication elsewhere, is not being considered for publication elsewhere and does not duplicate material already published. I confirm all authors consent to publication of this Work and authorise the granting of this licence.

1  
2  
3 1 ***It depends on how you tell: A qualitative diagnostic analysis of the implementation climate for***  
4  
5 2 ***community-wide mass drug administration for soil-transmitted helminths***  
6  
7

8 3  
9  
10  
11 4 Euripide Avokpaho<sup>1†</sup>, Sarah Lawrence<sup>2†</sup>, Amy Roll<sup>2,3</sup>, Angelin Titus<sup>4</sup>, Yesudoss Jacob<sup>4</sup>, Saravanakumar  
12  
13 5 Puthupalayam Kaliappan<sup>4</sup>, Marie Claire Gwayi-Chore<sup>2,3</sup>, Félicien Chabi<sup>1</sup>, Comlanvi Innocent Togbevi<sup>1</sup>,  
14  
15 6 Abiguel Belou Elijan<sup>1</sup>, Providence Nindi<sup>5</sup>, Judd L Walson<sup>2</sup>, Sitara Swarna Rao Ajjampur<sup>4</sup>, Moudachirou  
16  
17 7 Ibikounlé<sup>1,6</sup>, Khumbo Kalua<sup>5</sup>, Kumudha Aruldas<sup>4</sup>, Arianna Rubin Means<sup>\*2,3</sup>  
18  
19

20 8  
21  
22 9 † shared first authorship  
23  
24

25 10  
26  
27 11 <sup>1</sup> Institut de Recherche Clinique du Bénin, Abomey-Calavi, Bénin  
28

29 12 <sup>2</sup> Department of Global Health, University of Washington, Seattle, WA, USA  
30

31 13 <sup>3</sup> The DeWorm3 Project, Seattle, Washington, USA  
32

33 14 <sup>4</sup> The Wellcome Trust Research Laboratory, Division of Gastrointestinal Sciences, Christian Medical  
34  
35 15 College, Vellore, India  
36

37  
38 16 <sup>5</sup> Blantyre Institute for Community Outreach, Blantyre, Malawi  
39

40 17 <sup>6</sup> Centre de Recherche pour la lutte contre les Maladies Infectieuses Tropicales (CREMIT/TIDRC), Université  
41  
42 18 d'Abomey-Calavi, Benin  
43  
44

45 19  
46  
47 20 \* Corresponding author  
48

49 21 Email: aerubin@uw.edu  
50  
51

52 22  
53  
54 23  
55  
56 24 Word count: 5493  
57  
58  
59  
60

1  
2  
3 25 I, the Submitting Author has the right to grant and does grant on behalf of all authors of the Work (as  
4  
5 26 defined in the below author licence), an exclusive licence and/or a non-exclusive licence for  
6  
7 27 contributions from authors who are: i) UK Crown employees; ii) where BMJ has agreed a CC-BY  
8  
9 28 licence shall apply, and/or iii) in accordance with the terms applicable for US Federal Government  
10  
11 29 officers or employees acting as part of their official duties; on a worldwide, perpetual, irrevocable,  
12  
13 30 royalty-free basis to BMJ Publishing Group Ltd (“BMJ”) its licensees and where the relevant Journal  
14  
15 31 is co-owned by BMJ to the co-owners of the Journal, to publish the Work in BMJ Global Health and  
16  
17 32 any other BMJ products and to exploit all rights, as set out in our [licence](#).  
18  
19 33

20  
21 34 The Submitting Author accepts and understands that any supply made under these terms is made  
22  
23 35 by BMJ to the Submitting Author unless you are acting as an employee on behalf of your employer  
24  
25 36 or a postgraduate student of an affiliated institution which is paying any applicable article publishing  
26  
27 37 charge (“APC”) for Open Access articles. Where the Submitting Author wishes to make the Work  
28  
29 38 available on an Open Access basis (and intends to pay the relevant APC), the terms of reuse of  
30  
31 39 such Open Access shall be governed by a Creative Commons licence – details of these licences  
32  
33 40 and which [Creative Commons](#) licence will apply to this Work are set out in our licence referred to  
34  
35 41 above.  
36  
37  
38  
39  
40  
41  
42  
43  
44  
45  
46  
47  
48  
49  
50  
51  
52  
53  
54  
55  
56  
57  
58  
59  
60

## 42 ABSTRACT

43 **Objectives:** Current soil-transmitted helminth (STH) morbidity control guidelines primarily target  
44 deworming of pre-school and school-age children. Emerging evidence suggests that community-wide  
45 mass drug administration (cMDA) may interrupt STH transmission. However, the success of such programs  
46 depends upon achieving high treatment coverage and uptake. This formative analysis was conducted to  
47 evaluate the implementation climate for cMDA and to determine barriers and facilitators to launch.

48 **Settings:** Prior to the launch of a cMDA trial in Benin, India, and Malawi.

49 **Participants:** Community members (adult women and men, children, and local leaders), community drug  
50 distributors (CDDs), and health facility workers.

51 **Design:** We conducted 48 focus group discussions (FGDs) with community members, 13 FGDs with CDDs,  
52 and 5 FGDs with health facility workers in twelve randomly selected clusters across the three study  
53 countries. We utilized the Consolidated Framework for Implementation Research (CFIR) to guide the  
54 design of the interview guide and thematic analysis.

55 **Results:** Across all three sites, aspects of the implementation climate that were facilitators to cMDA  
56 launch included: high community member demand for cMDA, integration of cMDA into existing  
57 vaccination campaigns and/or health services, and engagement with familiar health workers. Barriers to  
58 launching cMDA included mistrust toward medical interventions, fear of side effects, and limited  
59 perceived need for interrupting STH transmission. We include specific recommendations from community  
60 members regarding cMDA distribution sites, personnel requirements, delivery timing and incentives,  
61 leaders to engage, and methods for mobilizing participants.

62 **Conclusions:** Prior to launching the cMDA program as an alternative to school-based MDA, cMDA was  
63 found to be generally acceptable across diverse geographic and demographic settings. Community

1  
2  
3 64 members, CDDs, and health workers felt that engaging communities and tailoring programs to the local  
4  
5 65 context are critical for success. Potential barriers may be mitigated by identifying local concerns and  
6  
7 66 addressing them via targeted community sensitization prior to implementation.  
8  
9  
10  
11 67  
12  
13

## 14 68 **Strengths and limitations of this study**

- 17 69 • This study conducted focus group discussions across three diverse settings, creating the opportunity  
18  
19 70 to understand similarities and differences in the implementation climate for community -wide mass  
20  
21 71 drug administration (cMDA) and STH transmission interruption.
- 22 72 • Some participants may have heard about the intervention before participating in focus-group  
23  
24 73 discussions (FGDs), which may pose threats to social desirability and response biases.
- 25 74 • Although a large number of FGDs were conducted across heterogeneous settings, the generalizability  
26  
27 75 of study findings may not be translatable to other STH-endemic areas.  
28  
29  
30  
31  
32  
33

## 34 76 35 36 37 77 **INTRODUCTION**

38  
39  
40  
41 78 Neglected tropical diseases (NTDs) affect some of the world's most impoverished populations and  
42  
43 79 contribute to a variety of morbidities that exacerbate existing health and economic inequities (1).  
44  
45 80 Infections with one group of NTD, soil-transmitted helminths (STH), are associated with anemia, cognitive  
46  
47 81 development delay, growth stunting, pre-term birth, and other adverse outcomes (2). World Health  
48  
49 82 Organization (WHO) guidelines recommend control of STH morbidities via annual or bi-annual deworming  
50  
51 83 of pre-school and school-age children and other high-risk groups, including pregnant women and  
52  
53 84 adolescent girls (3). However, in many settings, the current STH strategy would likely need to be continued  
54  
55  
56  
57  
58  
59  
60

1  
2  
3 85 until significant economic development and universal water, sanitation and hygiene (WASH) access are  
4  
5 86 broadly available to stop transmission of STH (4). Emerging evidence suggests that it may be possible to  
6  
7 87 interrupt transmission of STH by expanding deworming to treat individuals of all ages via community-wide  
8  
9  
10 88 MDA (cMDA) (5, 6).

11  
12  
13 89 The current standard of care for STH is school-based MDA to reach pre-school and school-age children,  
14  
15 90 and many school-based deworming programs have been successfully implemented for decades.  
16  
17 91 Transitioning from school-based MDA to cMDA for community-level STH transmission interruption will  
18  
19 92 require adapting long withstanding programs or designing new platforms for reaching much larger target  
20  
21  
22 93 populations. These transitions should be approached carefully, as they will likely affect community  
23  
24 94 member and health worker attitudes towards and engagement in new programs. The success of cMDA in  
25  
26 95 interrupting transmission of STH is indeed predicated upon programs attaining high treatment coverage  
27  
28 96 (drug receipt) and uptake (drug ingestion) (7, 8). Many STH-endemic communities have a long history of  
29  
30  
31 97 participating in other community-based mass distribution programs, including campaigns for lymphatic  
32  
33 98 filariasis (LF), onchocerciasis, trachoma, malaria bed net distribution, and/or mass immunization programs  
34  
35 99 such as polio campaigns (9). Factors that influence participation in mass campaigns include recipient trust  
36  
37  
38 100 in programs and efforts to tailor programs to local conditions (10). Negative campaign experiences or  
39  
40 101 perceptions can compromise the success of future programs, particularly those requiring high coverage  
41  
42 102 over multiple years to reach targeted transmission endpoints (11, 12).

43  
44  
45 103 Formative qualitative research can be used to understand community-member and implementer  
46  
47 104 perceptions of past, ongoing, or prospective community-based campaigns. Diagnostic analyses, an  
48  
49 105 application of formative evaluations, are particularly helpful in illuminating processes that can facilitate  
50  
51 106 or impede implementation. Diagnostic analyses help to identify determinants of current practices,  
52  
53  
54 107 potential barriers and facilitators to implementing new interventions, and the perceived feasibility or  
55  
56 108 utility of a new implementation strategy. This formative evidence can help researchers and implementers

1  
2  
3 109 understand potential implementation challenges and, ideally, address them prior to intervention launch  
4  
5 110 (13). In this study, we perform a diagnostic analysis of the implementation climate to proactively identify  
6  
7 111 factors influencing the launch of cMDA for STH transmission interruption, including (1) perceptions of  
8  
9 112 current deworming practice, (2) potential barriers and facilitators to transitioning from school-based MDA  
10  
11 113 to cMDA delivery, and (3) perceived effectiveness and need for cMDA (14).  
12  
13  
14

## 15 114 **METHODS**

16  
17  
18 115 This analysis was conducted at the outset of the DeWorm3 Project, a large hybrid type I community cluster  
19  
20 116 randomized trial in Benin, India, and Malawi (Table 1). Launched in 2017, the currently underway  
21  
22 117 DeWorm3 Project aims to determine the feasibility of interrupting STH transmission using twice annual  
23  
24 118 cMDA treating eligible individuals of all ages, relative to standard-of-care school-based MDA. More  
25  
26 119 information about the DeWorm3 cluster randomized trial design has been described in detail elsewhere  
27  
28  
29 120 (15-17).  
30  
31  
32  
33  
34  
35  
36  
37  
38  
39  
40  
41  
42  
43  
44  
45  
46  
47  
48  
49  
50  
51  
52  
53  
54  
55  
56  
57  
58  
59  
60



**Table 1. Overview of study sites**

|                                                 | Benin                                                                     | India                                                                                                                    | Malawi                                                                                                                |
|-------------------------------------------------|---------------------------------------------------------------------------|--------------------------------------------------------------------------------------------------------------------------|-----------------------------------------------------------------------------------------------------------------------|
| <b>Site</b>                                     | Commune of Comè                                                           | Vellore and Thiruvannamalai Districts, Tamil Nadu                                                                        | Mangochi District                                                                                                     |
| <b>Geographic area of site (km<sup>2</sup>)</b> | 148                                                                       | 477                                                                                                                      | 289                                                                                                                   |
| <b>Total number of households</b>               | 24,378                                                                    | 36,536                                                                                                                   | 27,750                                                                                                                |
| <b>Population size</b>                          | 94,969                                                                    | 140,932                                                                                                                  | 121,819                                                                                                               |
| <b>Standard of care</b>                         | Annual school-based MDA targeting children 5-14 years of age              | Biannual school-based MDA on National Deworming Days targeting children 1-19 years of age                                | Annual school-based MDA and Child Health Days targeting children 1-14 years of age                                    |
| <b>cMDA workforce</b>                           | Community drug distributors (CDDs), coordinated by the Ministry of Health | CDDs and Accredited Social Health Activists (ASHA), women working as health educators and promoters in their communities | Community health workers (Health Surveillance Assistants) who also fill the rolls of CDDs, coordinating with teachers |

123

124 **Sampling strategy**

125 Key stakeholders shaping the implementation climate for cMDA include community members and local  
 126 health workers. Focus group discussions (FGDs) were conducted separately with groups of community  
 127 members, including adult women and men (over 15 years), community leaders, and children (ages 12-15  
 128 years of age), local health workers, including CDDs, and Ministry of Health (MOH) health facility workers  
 129 who often serve as CDD supervisors.

130 Prior to trial randomization (e.g., before designations of intervention or control clusters were made), four  
 131 clusters were randomly selected in each site to conduct community-level FGDs. In each cluster, one FGD  
 132 was conducted within each community member strata (four total), two FGDs among drug distributors,  
 133 and one FGD among local MOH health facility workers. The sampling strategy for identifying and recruiting  
 134 community members for FGDs within each cluster differed slightly by site (Table 2). In India, purposive  
 135 sampling was employed, in which village leaders/influencers identified potential participants. In Malawi,  
 136 community members were selected to participate via pseudo-randomization from a pool of individuals

1  
2  
3 137 who attended outreach meetings at the chiefs/headmen's residence. The first five randomly approached  
4  
5 138 individuals from each demographic strata who agreed to participate were invited to attend FGDs within  
6  
7 139 the next week (except children, for whom parents/caregivers were approached). In Benin, community  
8  
9 140 members were selected from a randomly generated list of potential participants from a baseline census  
10  
11 141 database. The research team contacted the household heads by telephone and invited a specific individual  
12  
13 142 (woman, man, or child) to participate in an FGD. No more than one individual per household was selected  
14  
15 143 to participate in an FGD in a given cluster. Transportation was offered to individuals who needed access  
16  
17 144 to the FGD location. In Benin and India, local leaders were chosen using purposive quota sampling, during  
18  
19 145 which DeWorm3 study teams invited key leaders in each selected cluster. Leaders differ setting by setting,  
20  
21 146 wherein in some countries key leaders primarily include village chiefs while in other areas key leaders are  
22  
23 147 primarily religious leaders. Purposive quota sampling was also used to invite CDDs and health workers  
24  
25 148 from local health facilities located in each cluster to participate in FGDs.  
26  
27  
28  
29  
30

31 **Table 2: Sampling strategy by stakeholder group**

| Stakeholder                             | Targeted sample size (per FGD) | Sampling strategy                                                             |
|-----------------------------------------|--------------------------------|-------------------------------------------------------------------------------|
| Community members                       |                                |                                                                               |
| Adult women (15+ years of age)          | 5-10                           | Purposive sampling (India)<br>Random sampling (Benin <sup>1</sup> and Malawi) |
| Adult men (15+ years of age)            | 5-10                           |                                                                               |
| Local leaders                           | 5-10                           |                                                                               |
| Children (12-15 years of age)           | 5-10                           |                                                                               |
| Health center staff and CDD supervisors | 5-10                           | Purposive quota sampling                                                      |
| Community drug distributors (CDDs)      | 10-15                          | Purposive quota sampling                                                      |

<sup>1</sup>Purposive quota sampling was used to sample local leaders in Benin and India

32  
33  
34  
35  
36  
37  
38  
39  
40  
41  
42  
43  
44  
45  
46  
47 150

## 48 151 **Data collection**

49  
50  
51 152 This diagnostic analysis study design is informed by the Consolidated Framework for Implementation  
52  
53 153 Research (CFIR), a meta-theoretical framework of 38 constructs that provides a typology of constructs for  
54  
55 154 characterizing potential determinants (barriers and facilitators) to implementation from the perspective  
56  
57  
58  
59  
60

1  
2  
3 155 of individuals involved in implementation (18). The CFIR has been used widely in low-and-middle-income  
4  
5 156 countries to identify factors that could influence or are actively influencing successful implementation  
6  
7 157 (19). CFIR constructs are organized according to five major domains influencing implementation and  
8  
9  
10 158 implementation effectiveness including (1) the intervention, (2) the inner setting, (3) the outer settings,  
11  
12 159 (4) the individuals involved, and (5) the process for accomplishing the intervention. While the CFIR can be  
13  
14 160 used at any stage of implementation, when applied pre-implementation, the CFIR can help proactively  
15  
16 161 identify opportunities and challenges facing implementation and inform adaptations to implementation  
17  
18  
19 162 strategies for the local context (18, 20).

20  
21  
22 163 We drew upon the CFIR to inform the design of four semi-structured interview guides with a mix of  
23  
24 164 respondent and informant style questions, tailored to each stakeholder group (one question guide was  
25  
26 165 used for all adult community members). In this study, we identified *a priori* 23 CFIR constructs across all  
27  
28 166 five domains that we hypothesized would influence the implementation climate for cMDA and which were  
29  
30  
31 167 appropriate for use during formative diagnostic research prior to implementation (Appendix 1) (20). The  
32  
33 168 question guides were piloted and adapted slightly by changing word choice or sentence construction as  
34  
35 169 necessary within each site to ensure that the questions were clear, meaningful, and culturally appropriate.  
36  
37  
38 170 Site adapted question guides were thereafter translated into local languages including Yao (Malawi) and  
39  
40 171 Tamil (India), and the official language (French) in Benin. FGD facilitators in Benin adapted the French  
41  
42 172 question guide to local languages, including Watchi and Pédah when necessary, during FGD facilitation.  
43  
44

45 173 All participants provided written consent prior to the start of the FGD. The parents or caregivers of  
46  
47 174 participating children similarly provided written consent and children ages 12-15 also provided written  
48  
49 175 assent. Consent and assent could also be provided by a thumbprint in the presence of a witness. FGDs  
50  
51 176 were conducted in private locations with both a facilitator and notetaker present and all FGDs were audio-  
52  
53  
54 177 recorded with participant permission.

## 178 **Analysis**

179 Audio files were transcribed verbatim in the local or official language. For each transcript, two one-minute  
180 random spot checks were conducted on each audio file for quality assurance. All transcripts were then  
181 translated into English. All transcriptions and their translations were reviewed by a second individual  
182 fluent in both English and the local language for quality assurance. Transcripts were imported into ATLAS.ti  
183 version 8 (Scientific Software Development GmbH, Berlin, Germany), which was used to manage data  
184 analysis. Coders were based in each DeWorm3 site as well as at the central level (University of  
185 Washington, Seattle). For data collected in Benin and India, two primary coders were assigned to each  
186 transcript, with a third coder designated as the “tie-breaker.” When possible, at least one coder was based  
187 at the site in which the data were collected, and the other coder was a member of the DeWorm3 central  
188 team. For data collected in Malawi, a single primary coder from the central level coded the data while a  
189 secondary coder at the site reviewed and validated the findings, due to coder availability. Each primary  
190 coder independently read and coded each transcript primarily using a deductive approach and a CFIR-  
191 based codebook. Coding teams from each country and the central level met via conference calls to  
192 iteratively refine code definitions and code inclusion/exclusion criteria until a final codebook was  
193 established. After a transcript was coded, the coders assigned to the transcript met via conference call for  
194 consensus meetings to discuss where applied codes diverged. When necessary, a third coder weighed in  
195 where consensus between primary coders was not reached. Data saturation was reached as no new  
196 themes emerged during iterative review of the collected data.

197 The final coded transcripts were used to create case memos that were grouped by stakeholder category  
198 and site. The case memos included a summary of how the code was applied for a given stakeholder group,  
199 a justification for the summary provided noting code patterns and latent messages, and specific quotes  
200 highlighting how the code was applied. The summaries, patterns, and themes from the coded transcripts

1  
2  
3 201 and case memos were used to guide thematic analysis, an analytical method that is useful for summarizing  
4  
5 202 key features of large datasets using a clearly-structured approach (21, 22).  
6  
7

### 8 203 **Patient and public involvement**

9

10  
11 204 Community members and health workers living in the sampled STH endemic areas were not involved in  
12  
13 205 design, conduct, or reporting of this qualitative study. However, all feedback from community members  
14  
15 206 was used to shape a subsequent community-based intervention within a larger clinical trial.  
16  
17

### 18 207 **Ethical approval**

19

20  
21 208 This study has been reviewed and approved by the Institut de Recherche Clinique du Bénin (IRCB) through  
22  
23 209 the National Ethics Committee for Health Research (002-2017/CNERS-MS) from the Ministry of Health in  
24  
25 210 Benin, The London School of Hygiene and Tropical Medicine (12013), The College of Medicine Research  
26  
27 211 Ethics Committee (P.04/17/2161) in Malawi, and Christian Medical College, Vellore, in India (10392). The  
28  
29 212 study was also approved by The Human Subjects Division at the University of Washington  
30  
31 213 (STUDY00000180).  
32  
33  
34  
35

## 36 214 **RESULTS**

37  
38

39 215 In this study, 48 FGDs were conducted with community members – four FGDs (one per cluster) for each  
40  
41 216 stakeholder group: adult women, adult men, children, and local leaders, totaling 16 in each site, 13 with  
42  
43 217 CDDs (two each in Benin and Malawi, nine in India), and five with CDD supervisors (two in Benin and three  
44  
45 218 in India).  
46  
47

48  
49 219 Across FGDs and settings, key themes emerged within four CFIR domains and are presented accordingly  
50  
51 220 below: intervention characteristics, inner settings, characteristics of individuals, and process. Factors  
52  
53 221 positively influencing the implementation climate for cMDA across sites included community member  
54  
55 222 demand for community-wide (versus school-based) MDA, integration of MDA into existing vaccination  
56  
57  
58  
59  
60

1  
2  
3 223 campaigns and/or health services, and engagement with health workers (including trained CDDs) rather  
4  
5 224 than community volunteers. Factors negatively affecting the implementation climate across sites included  
6  
7 225 mistrust and resistance toward medical interventions, fear of side effects, and limited perceived need.  
8  
9  
10 226 Additional process recommendations emerged as key themes that varied slightly across sites and included  
11  
12 227 suggestions regarding MDA distribution sites and distributors, treatment costs/financial incentives,  
13  
14 228 engaging leaders, and engaging participants through sensitization and mobilization efforts.

### 17 229 **Intervention characteristics**

20 230 *Relative advantage: cMDA is preferable to school-based MDA*

23 231 The CFIR construct of *relative advantage* captures participant perceptions regarding the benefits of  
24  
25 232 implementing one intervention compared to an alternative (18). Across community member and health  
26  
27 233 worker/CDD groups and sites, participants identified a preference for cMDA as compared to school-based  
28  
29 234 deworming programs for several reasons. Participants stressed that providing STH treatment to both  
30  
31 235 children and adults is the only way to prevent STH reinfection.

35 236 Across stakeholder groups, participants also highlighted that children who were not enrolled in school  
36  
37 237 would be able to receive treatment through cMDA. Adult community members in Benin and Malawi were  
38  
39 238 particularly concerned that school-based MDA campaigns do not always provide parents with treatment  
40  
41 239 information prior to distribution and often administer the medications without parental consent or trust.  
42  
43 240 Additionally, they thought uptake would be improved if parents are involved in treatment administration.

47 241 *It's better to go through the parents to reach the kids. Parents know how to approach their*  
48  
49 242 *children, manage them and make them understand the benefit of the thing [medicine]. The child*  
50  
51 243 *will easily take the medicine without any effect. (Cluster 26, Women, Benin)*

1  
2  
3 244 Across FGDs and sites, participants were enthusiastic that cMDA could interrupt STH transmission and  
4  
5 245 increase parental engagement with the intervention, particularly to enable parental consent, and allow  
6  
7 246 them to encourage and confirm their child's uptake.  
8  
9

10 247 *Design quality & packaging: Door-to-door MDA delivery by highly trained, familiar distributors is preferred*

11  
12  
13 248 *Design quality* describes stakeholder recommendations for how to bundle, present, and assemble the  
14  
15 249 intervention (18). Across sites and stakeholder groups, campaigns that delivered services door-to-door  
16  
17 250 were considered more desirable than those that used a central distribution site (Table 3). In India,  
18  
19 251 community participants reflected upon past experiences with LF MDA campaigns that were door-to-door  
20  
21 252 whereas participants in Benin reflected upon experiences with door-to-door vaccination campaigns and  
22  
23 253 bed net distributions at local health centers. Long waiting times, associated with lost income and  
24  
25 254 productivity, were identified as primary barriers to central distribution sites. One female participant in  
26  
27 255 Benin reported she would not wait around all day for someone to distribute MDA but instead would just  
28  
29 256 purchase the medications herself, given their low costs. Additionally, participants stressed that door-to-  
30  
31 257 door campaigns improve equity by increasing the likelihood of reaching those unable to travel due to  
32  
33 258 financial or physical barriers.  
34  
35  
36  
37

38  
39 259 *The HSAs should go door by door to give people the medicine as some people, for example old and*  
40  
41 260 *crippled, may not be able to go and access the drugs. But if they go door by door, then everyone*  
42  
43 261 *receives the drugs and not only those who walk.* (Cluster 21, Women, Malawi)  
44  
45

46 262 Community members and leaders across sites, participants preferred to receive treatment from  
47  
48 263 individuals perceived to be health professionals, especially a familiar health worker or CDD, or someone  
49  
50 264 working with a well-respected non-governmental organization (NGO). Participants believed that  
51  
52 265 increased health worker engagement could alleviate community mistrust linked with fear of adverse  
53  
54 266 events by medicalizing the distribution process and making community members feel safer, thereby  
55  
56  
57  
58  
59  
60

1  
2  
3 267 increase treatment coverage. Men in Malawi stressed that health volunteers are often poorly respected  
4  
5 268 and mistrusted, while clinically-trained health professionals are typically more respected. Of paramount  
6  
7 269 importance for adult community members and CDDs was that distributors are known members of the  
8  
9  
10 270 community.

11  
12  
13 271 *When community members see new faces during a project, they tend to be resistant, so it is better*  
14  
15 272 *to use people from the area and not strangers. If not, this may not be successful. (Cluster 21, Local*  
16  
17 273 *leader, Malawi)*

18  
19  
20 274 *But above all, it is necessary to involve health workers, who the population trusts....Many are afraid*  
21  
22 275 *because they do not see us, they do not see the health workers on the ground. (Health Center Staff,*  
23  
24 276 *Benin)*

25  
26  
27 277 In Benin, local leaders noted that when NGOs engage in cMDA, it is important they are well-respected and  
28  
29 278 have well-recognized logos that community members are familiar with and trust based on their prior  
30  
31 279 work. Regardless if cMDA is administered by a health professional, volunteer, or NGO, community  
32  
33 280 members across sites noted that their willingness to participate in cMDA is driven by their perception that  
34  
35 281 they have been fully and accurately informed about cMDA, and that they have had time to ask questions.

36  
37  
38  
39 282 *Even if it [deworming medication] is given for free, they will not eat it unless it has been explained*  
40  
41 283 *and given. If they are told they will benefit...with awareness in the villages, they will eat it. (Cluster*  
42  
43 284 *12, CDD, India)*

44  
45  
46  
47 285 Community members expressed that they wanted to be treated with dignity and that their participation  
48  
49 286 in community-wide public health campaigns of any kind should not be taken for granted.

50  
51  
52 287 *Whether they eat the tablet or not it depends on to what extent this information reaches the*  
53  
54 288 *people. It depends on how you tell. (Cluster 34, Men, India)*



1  
2  
3 289 *The messages about drugs should be given to us in good time and not just tell us like today that*  
4  
5 290 *tomorrow we will have a drug administration activity. Many people need time to ask questions*  
6  
7 291 *and clear their myths before they get treated. Some people tend to refuse medicine because of*  
8  
9 292 *fear of side effects, so when you sensitize them for a long time, they tend to listen and at the end*  
10  
11 293 *the program becomes successful. So avoid short notice messages, people are difficult. They need*  
12  
13 294 *enough time to understand what is happening. (Cluster 21, Men, Malawi)*  
14  
15  
16

17 295 In Malawi, local leaders reported that community members want to be followed up with after distribution  
18  
19 296 to monitor for adverse events or continued engagement with distribution programs to foster trust in  
20  
21 297 future campaigns. Without this, the leaders feared that negative rumors might proliferate, or  
22  
23 298 communities might feel as though they only received treatment for research purposes, rather than for  
24  
25 299 their wellbeing.  
26  
27  
28

29 300 *Intervention complexity: cMDA is complex, but still feasible to implement*  
30  
31

32 301 The CFIR construct of *complexity* is defined as the perceived difficulty of implementing an intervention  
33  
34 302 (18). Across groups, participants were concerned about the timing of cMDA, the distance to distribution  
35  
36 303 sites if cMDA is centrally located as opposed to delivered door-to-door, and whether or not they would  
37  
38 304 have sufficient notice about cMDA before the campaign begins. Many community members suggested  
39  
40 305 optimal distribution times, which varied by site depending on common work schedules and holidays.  
41  
42 306 Concerns regarding health worker/CDD knowledge and accommodation of community members'  
43  
44 307 schedules were prevalent across FGDs but some participants stressed they would change their schedules  
45  
46 308 to be present for distribution if informed by community leaders.  
47  
48  
49

50 309 *Even if someone has a plan to go to the field or to the market, three days before the distribution*  
51  
52 310 *of the drug, they will cancel their plan and come and listen to what the village chief invited them*  
53  
54 311 *to do...if everyone is not informed, it [MDA] cannot succeed. (Cluster 10, Women, Benin)*  
55  
56  
57  
58  
59  
60

1  
2  
3 312 Adults and children across sites recommended that distribution over multiple days within a community to  
4  
5 313 reach the greatest number of people.  
6  
7

8 314 *The period of drug administration should be long so that everyone is able to receive treatment.*

9  
10 315 *Some people may not be home during the time that you have set to administer the drugs and as*

11  
12 316 *such if done for maybe only a day, it means those people will not receive the drugs. But if it is for*

13  
14  
15 317 *some more days then everyone will be treated. (Cluster 21, Men, Malawi)*  
16  
17

### 18 318 **Inner setting**

19  
20  
21 319 *Implementation climate: Initial mistrust of MDA is likely, but demand and perceived need will counter this*

22  
23  
24 320 The CFIR construct *implementation climate* captures comments related to the community member's

25  
26 321 receptivity to implementation, and the extent to which implementation is supported (18). The core

27  
28 322 component of implementation climate discussed across FGDs were factors that influence community

29  
30 323 member trust in treatment campaigns. Participants across the sites anticipated high levels of initial

31  
32 324 mistrust and potential resistance toward newly launched cMDA for STH. This initial mistrust is driven by

33  
34 325 personal and anecdotal evidence of adverse side-effects such as fatigue, stomachaches, and fever after

35  
36 326 previous school-based deworming MDA campaigns.  
37  
38  
39

40 327 *Other pupils received the medical treatment before they ate a meal, hence they vomited. So those*

41  
42 328 *that did not receive the medical treatment were afraid of vomiting too if they took the medicine.*

43  
44 329 (Cluster 19, Children, Malawi)  
45  
46

47 330 *They will eat [medication] based on the trust. They will eat [medication] based on your approach,*

48  
49 331 *otherwise they may take and keep it aside somewhere.... (Cluster 17, Men, India)*  
50  
51

52 332 In Malawi, limited follow-up by transitory MDA programs and research projects was also noted as fueling

53  
54 333 mistrust of community health programs. Similarly, in one CDD FGD in India, participants identified mistrust  
55  
56  
57  
58  
59  
60

1  
2  
3 334 of government programs as a potential barrier to MDA campaigns where medications are provided for  
4  
5 335 free. CDDs explained that community members perceive government provided medications to be of  
6  
7 336 poorer quality and therefore less effective with greater risks of side effects; therefore, those who can  
8  
9 337 afford to purchase their own medications from pharmacies will often do so.

11  
12  
13 338 *For people who can, they will get it [deworming medicine] from the medical shop. Whatever is*  
14  
15 339 *given through the government they will keep it aside and they will not use it. (Cluster 15, CDD,*  
16  
17 340 *India)*

18  
19  
20 341 In Benin, some participants from the men's, women's, and CDD FGDs shared concerns that drugs used in  
21  
22 342 such campaigns might be given by Westerners with malintent.

23  
24  
25 343 *The majority of the population does not understand. They think that the drugs are poisoned in*  
26  
27 344 *order to reduce the African population. (Cluster 10, Men, Benin)*

28  
29  
30 345 Similarly, in Malawi, CDDs identified rumors and misinformation as major barriers to delivering cMDA with  
31  
32 346 high coverage. Specific rumors include that stool collected for STH surveillance would be used for Satanist  
33  
34 347 practices, rather than medical purposes, and that school-based deworming programs provide  
35  
36 348 contraceptives to young children to reduce population growth.

37  
38  
39  
40 349 While participants noted that mistrust and resistance might initially be high following a transition to cMDA  
41  
42 350 for STH, there was still a strong perceived demand for deworming of all ages, and a sentiment that  
43  
44 351 community sensitization could overcome these concerns.

45  
46  
47 352 *...we are looking forward to this [community-based MDA] and we would like this to be a regular*  
48  
49 353 *treatment. People are suffering from intestinal worms and only children receive the treatment. So*  
50  
51 354 *this project [DeWorm3] will help all of us to receive treatment. (Cluster 21, Men, Malawi)*

52  
53  
54  
55 355 *Compatibility: Community-based MDA is highly compatible with existing health infrastructure*

1  
2  
3 356 The CFIR construct *compatibility* is highly related to *implementation climate*, capturing the alignment  
4  
5 357 between the innovation and existing values and priorities (18). Health facility workers and CDDs across  
6  
7 358 sites noted cMDA should be integrated into existing community programs or, at a minimum, coordinate  
8  
9  
10 359 with ongoing community-based activities to improve treatment coverage and mitigate risks of conflict  
11  
12 360 with ongoing local health programs. CDDs in India and community leaders in Benin identified community-  
13  
14 361 based vitamin A and iron distribution and childhood vaccination campaigns as ideal programs to integrate  
15  
16 362 with cMDA. In India, CDDs also suggested integrating cMDA with existing indoor residual spraying  
17  
18 363 programs for vector control.

21  
22 364 *The voluntary workers who go house to house to spray mosquitoes, we can make use of them to*  
23  
24 365 *give the tablet...Earlier they were going once a month or once a week, but now they go daily house*  
25  
26 366 *to house. We can give through them. (Cluster 17, CDD, India)*

29 367 *Available resources: Training, storage, and hygiene infrastructure are key resources for MDA*  
30  
31 368 *implementation*

34 369 The CFIR construct *available resources* describes the financial and material resources available (and  
35  
36 370 desired) for implementation, including training and education, space, time, and money (18). Health facility  
37  
38 371 workers and CDDs across sites stressed that existing resources may not be sufficient for delivery of cMDA.  
39  
40 372 CDDs in particular were concerned about receiving adequate training and access to resources to take  
41  
42 373 home for self-review. CDDs and health workers highlighted that they wanted more than a single one-day  
43  
44 374 training prior to MDA, in order to provide adequate time to practice and apply skills in a training  
45  
46 375 environment. Across sites, CDDs noted the importance of training before distribution.

50 376 Other key resources identified by CDDs and health workers in Benin included medication storage in the  
51  
52 377 field, community education materials, shelter during inclement weather, as well as food, water, and  
53  
54 378 financial incentives for CDDs. CDDs in Benin were particularly concerned with timely payment for their

1  
2  
3 379 work. In Malawi, local leaders noted that in the past villagers have felt burdened by volunteering for health  
4  
5 380 program implementation without compensation. They also noted that villagers might expect payment for  
6  
7  
8 381 participating in MDA, given past experiences with research projects providing stipends. In India, health  
9  
10 382 facility workers wanted to ensure they would have adequate staffing to assist during MDA.

11  
12  
13 383 Lastly, CDDs and health center personnel across sites, women in Benin, and leaders in India stressed that  
14  
15 384 hygiene infrastructure needs to be improved and that investing in WASH as part of a broader STH  
16  
17 385 elimination program might, as a result, increase treatment coverage of cMDA by demonstrating long-term  
18  
19 386 investments in community well-being.

20  
21  
22 387 *The rules of hygiene are very important, very, very important. Without it, we cannot right away*  
23  
24 388 *start distributing the drugs and say that we want to completely eradicate the transmission of*  
25  
26  
27 389 *worms, impossible. (CDD, Benin)*

### 30 390 **Characteristics of individuals**

31  
32  
33 391 *Knowledge & beliefs: Skepticism of the clinical rationale for MDA, fear of side effects, and limited perceived*  
34  
35 392 *need for treatment will be barriers to cMDA*

36  
37  
38 393 The *knowledge and beliefs* CFIR construct is defined as individuals' attitudes toward and value placed on  
39  
40 394 implementation and their familiarity with related facts, truths, and principles (18). While participants  
41  
42 395 strongly believed cMDA could eliminate STH transmission, some reservations about MDA rooted in  
43  
44 396 knowledge and perceptions about deworming medications remain. For example, adult men and children  
45  
46  
47 397 in Benin and local leaders in Malawi raised concerns about the effects of treating people who may not be  
48  
49 398 infected with STH.

50  
51  
52 399 *When you get the drugs and you do not have the worms, the tablet can still damage your organs*  
53  
54 400 *such as organs of digestion or breathing. (Cluster 1, Children, Benin)*

1  
2  
3 401 In India and Malawi, participants in the men's FGDs thought individuals who feel healthy might perceive  
4  
5 402 themselves to be at low risk of STH and thus choose not to participate in cMDA. Women in Malawi  
6  
7 403 reported this occurred during prior cMDA campaigns while women in India also noted individuals with  
8  
9 404 limited literacy might not understand the need for treatment and be reluctant to participate in MDA  
10  
11 405 campaigns.

12  
13  
14  
15 406 *Self-efficacy: Community members and CDDs will be key mobilizers for cMDA*

16  
17  
18 407 The CFIR construct *self-efficacy* captures comments that reflect an individual's beliefs in their own abilities  
19  
20 408 to achieve implementation goals (18). Women and community leaders in Benin identified themselves as  
21  
22 409 important catalysts in influencing the acceptability of MDA by working together and influencing their  
23  
24 410 social networks.

25  
26  
27 411 *The process is simple as we have just understood, we will also explain to our brothers and sisters*  
28  
29 412 *who will not accept that treatment is a good thing. We will tell them they should not be*  
30  
31 413 *discouraged adding that there is good in it. It's up to us to explain to them. (Cluster 1, Women,*  
32  
33 414 *Benin)*

34  
35  
36  
37 415 Health facility workers and CDDs also identified themselves as important contributors to ensuring  
38  
39 416 successful MDA implementation, given their existing relationships with communities.

40  
41  
42 417 *We worked with them and they know us on the ground to be able to do the job, so there are no*  
43  
44 418 *issues for community health workers. (CDD, Benin)*

45  
46  
47 419

48  
49 420 **Process**

50  
51  
52 421 *Engaging: Local leaders and sensitization activities are essential for ensuring high treatment coverage*  
53  
54  
55  
56  
57  
58  
59  
60

422 The CFIR construct *engaging* is defined as approaches to attracting and involving individuals in  
 423 implementation, such as through social marketing or education campaigns (18). Adult participants across  
 424 sites, including local leaders, identified specific leaders as key facilitators of effective implementation  
 425 (Table 2). These leaders should be notified in advance of interventions taking place within their  
 426 communities to gain their support and promote the intervention prior to implementation. Advance  
 427 sensitization with information about the distribution time as well as potential intervention benefits and  
 428 risks were identified as critical pieces of information that influence the implementation climate and, in  
 429 effect, effective delivery of cMDA. Preferred engagement methods varied slightly across sites, however  
 430 community members suggested that a variety of information-sharing mechanisms be utilized in advance  
 431 of MDA to improve community member knowledge and buy-in (Table 3).

**Table 3:** Recommendations to optimize the implementation climate for newly launched cMDA

| Recommendation category                                         | Benin                                                                                    | India                                                                                                                                                                                                                                                             | Malawi                                                                                                               |
|-----------------------------------------------------------------|------------------------------------------------------------------------------------------|-------------------------------------------------------------------------------------------------------------------------------------------------------------------------------------------------------------------------------------------------------------------|----------------------------------------------------------------------------------------------------------------------|
| <i>MDA distribution mode</i>                                    | Door-to-door distribution                                                                | Door-to-door distribution preferable; potential for 3-4 central distribution sites in some communities                                                                                                                                                            | Door-to-door distribution                                                                                            |
| <i>Intervention cost/financial incentives for participation</i> | Free, but need to address rumors about nefarious intentions behind free MDA distribution | Free treatment preferable to most participants; need to address fears of perceived poor-quality medications provided by government programs. Financial incentives should not be given for MDA participation, but incentives such as combs and soap were suggested | Free, but communities with past exposure to research studies might expect financial incentives for MDA participation |
| <i>Community drug distributor preferences</i>                   | Health workers (health facility workers or CDDs) who are familiar to community members   | Trained health workers (nurses, doctors, ASHAs) who are familiar. Individuals without training should not be distributors                                                                                                                                         | Health workers (including HSAs) who are familiar to community members. Volunteers are less                           |

|                                                              |                                                                                                                                                                                                                                              |                                                                                                                                                                                                  |                                                                                                                                                                |
|--------------------------------------------------------------|----------------------------------------------------------------------------------------------------------------------------------------------------------------------------------------------------------------------------------------------|--------------------------------------------------------------------------------------------------------------------------------------------------------------------------------------------------|----------------------------------------------------------------------------------------------------------------------------------------------------------------|
|                                                              |                                                                                                                                                                                                                                              |                                                                                                                                                                                                  | respected and should not be distributors                                                                                                                       |
| <i>Duration and time of distribution</i>                     | Distribution over multiple days to accommodate different household schedules and reach the greatest number of people. Rainy season and market days should be avoided. Must consider work schedules and implement flexible distribution times | Distribution over multiple days. Evening or early morning preferred distribution time to accommodate work schedules                                                                              | Distribution over multiple days to accommodate different household schedules and reach the greatest number of people                                           |
| <i>Key leaders to engage prior to cMDA</i>                   | Village chiefs, religious leaders, and health workers                                                                                                                                                                                        | President and ward councilor of community (Panchayat), other health workers (Anganwadi workers), and teachers                                                                                    | Village chiefs, local leaders, religious leaders, local NGOs, HSAs, and teachers                                                                               |
| <i>Community education topics to engage MDA participants</i> | Educate community about purpose and potential side effects of treatment                                                                                                                                                                      | Educate community about purpose, advantages, and potential side effects of treatment, and proper dosage for different people (e.g., children, elders)                                            | Educate community about purpose and potential side effects of treatment; sensitization must be done more than one day in advance to allow decision-making time |
| <i>Mechanisms for engaging community members</i>             | Utilize radio, phones, community meetings, and word of mouth to share information. Ring gongs at distribution time                                                                                                                           | Utilize radio, loudspeaker announcements, flyers, health documentaries, TV news, community meetings (women's groups), and community dramas to share information. Beat drums at distribution time | Utilize radio, phones, loudspeaker announcements, dramas, community meetings, door-to-door outreach, to share information                                      |

432

433

## 434 DISCUSSION

435 This diagnostic analysis highlights opportunities and challenges of launching cMDA for STH that are shared  
 436 across geographic areas as well as important differences between them. Our findings build upon the



1  
2  
3 437 existing literature and demonstrate strong acceptability of cMDA for STH interruption, particularly as an  
4  
5 438 alternative to school-based distribution to provide more equitable access to deworming treatment. When  
6  
7 439 considering a transition from school-based distribution to cMDA, participants highlighted opportunities  
8  
9 440 to integrate cMDA into existing community health programs, such as vaccination campaigns, and the  
10  
11 441 importance of engaging clinically trained, trusted drug distributors to mitigate fears of adverse events and  
12  
13 442 increase treatment coverage. Utilizing local CDDs from the same area or are directly known to the  
14  
15 443 recipients, is associated with high MDA coverage in other settings. (23, 24) While familiarity was important  
16  
17 444 to participants in this study, they also stressed comprehensive clinical training for CDDs as essential for  
18  
19 445 fostering trust during cMDA. While participants identified potential benefits of launching cMDA, they also  
20  
21 446 noted key barriers that might limit implementation success. Similar to findings from studies exploring  
22  
23 447 MDA barriers post-implementation, the primary barriers identified across sites included mistrust toward  
24  
25 448 free drug distribution (especially those provided by community volunteers perceived to have no clinical  
26  
27 449 training), fear of side effects, and limited perceived need for treatment without symptoms (12, 25-27).  
28  
29 450 This information is essential for adapting interventions to fit the specific context and concerns of  
30  
31 451 communities prior to making a significant change to public health programs, such as changing from school-  
32  
33 452 based delivery to community-wide delivery of deworming medicines.  
34  
35  
36  
37  
38  
39 453 In this formative evaluation, we synthesized recommendations from community members to assist in  
40  
41 454 intervention optimization at a site level, including preferred treatment time and distribution methods.  
42  
43 455 Site specific preferences and recommendations for implementation varied to small degrees across  
44  
45 456 settings, including preferred distribution times, campaign duration, location, distributor qualifications,  
46  
47 457 and procedures for engaging leaders and community participants. Other studies have found that  
48  
49 458 proactively identifying specific times when individuals are generally available to receive treatment is an  
50  
51 459 essential facilitator of effective campaign delivery (28-30), and when not completed can increase  
52  
53 460 frustration with community-based volunteer distributors (25) and the MDA campaign itself (31). Where  
54  
55  
56  
57  
58  
59  
60

1  
2  
3 461 trial timeline and funding allow, formative evaluations such as this may facilitate proactive identification  
4  
5 462 of potential barriers and of implementation processes to optimize community acceptability and adapt  
6  
7 463 intervention delivery as needed. When timelines or funding are limited, like during cMDA implemented  
8  
9  
10 464 by national NTD programs in limited resources settings, brief surveys prior to MDA and interim analyses  
11  
12 465 and may be conducted to tailor MDA implementation.

13  
14  
15 466 Emerging themes from community member, local leader, CDD, and health worker FGDs were highly  
16  
17 467 consistent. However, CDDs and health workers noted unique facilitators and barriers affecting their work,  
18  
19 468 including time for training, resources in the field, and timely compensation, similar feedback from  
20  
21 469 implementers in other settings (26). CDDs, health workers, and community leaders also uniquely stressed  
22  
23 470 the importance of packaging WASH interventions with MDA for STH elimination. These sentiments reflect  
24  
25 471 advanced knowledge of STH transmission but may also reflect doubt that transmission interruption  
26  
27 472 programs predicated on broadly delivered MDA will interrupt transmission without also improving  
28  
29 473 hygiene infrastructure. In fact, most of the benefits attributed to cMDA amongst these cadres was driven  
30  
31 474 by beliefs that MDA will be more acceptable when delivered in the community, as opposed to its potential  
32  
33 475 for interrupt transmission. Although evidence regarding the effectiveness of WASH on STH transmission  
34  
35 476 interruption is still weak, it is also important to monitor how implementer and community enthusiasm for  
36  
37 477 cMDA changes over time, potentially driven by the absence of WASH interventions (32).

38  
39  
40  
41  
42 478 Participants across all geographic areas noted that myths and rumors could pose serious challenges to  
43  
44 479 cMDA delivery, adding further to the literature documenting this obstacle in other settings (10, 26, 33,  
45  
46 480 34). Children in Benin and Malawi noted specific concerns about side effects of deworming treatment  
47  
48 481 circulating within schools prior to and post-MDA campaigns. While side effects for albendazole are  
49  
50 482 typically quite mild, albendazole is often co-administered to children with praziquantel as preventative  
51  
52 483 chemotherapy for schistosomiasis. Praziquantel can cause relatively more severe side effects, including  
53  
54 484 diarrhea and vomiting (35). Thus, prior experiences with MDA campaigns including other treatments

1  
2  
3 485 might influence future perceptions about albendazole specifically or MDA generally (36). Evidence  
4  
5 486 suggests that effective health workers can overcome these individual-level perceptions (31); addressing  
6  
7 487 myths and rumors will require targeted and pro-active community sensitization and CDD training that  
8  
9 488 openly discuss local myths and rumors pre-intervention.

11  
12 489 Mistrust toward public health campaigns and government-run health programs was prevalent across  
13  
14 490 settings. These concerns were driven by prior negative experiences with medical interventions and  
15  
16 491 programs in which limited information was provided in advance of treatment, parents were minimally  
17  
18 492 engaged in school-based MDA, and there were perceived concerns about drug quality. Potential strategies  
19  
20 493 for overcoming these barriers include engaging local leaders (29, 33, 37), targeted education campaigns  
21  
22 494 (26, 38, 39), community mobilization (37, 40, 41), and engagement of trusted, trained personnel to  
23  
24 495 administer preventive treatment.

25  
26  
27  
28  
29 496 During the design of our initial question guide (Appendix 1), we drew from selected constructs across all  
30  
31 497 CFIR domains. However, during data analysis no constructs within the outer setting emerged as major  
32  
33 498 facilitators or barriers to launch of cMDA campaigns. The outer setting domain is comprised of constructs  
34  
35 499 representing external influences on implementation and, perhaps because these data were collected at  
36  
37 500 the community-level, respondents were more focused on individuals involved in implementation and  
38  
39 501 implementation processes (18). Additionally, because we conducted a formative study we did not link  
40  
41 502 identified implementation determinants to observed implementation outcomes, however subsequent  
42  
43 503 data collection activities in DeWorm3—once the trial is underway and outcome data are collected—will  
44  
45 504 afford these opportunities (20).

46  
47  
48  
49  
50 505 This study had several limitations. Some participants may have heard about DeWorm3 before  
51  
52 506 participating in FGDs, which may have contributed to social desirability or response biases. While a large  
53  
54  
55  
56  
57  
58  
59  
60

1  
2  
3 507 number of FGDs were conducted across heterogeneous settings, it is also possible that the study findings  
4  
5 508 may not be generalizable to other STH-endemic areas.  
6  
7

## 8 509 **Conclusion**

10  
11 510 This study supports that cMDA, particularly as an alternative to school-based MDA, is generally acceptable  
12  
13 511 across heterogeneous settings and builds upon the existing literature exploring facilitators and barriers of  
14  
15 512 launching and implementing cMDA. Community engagement including STH education, understanding  
16  
17 513 preferred distribution times and methods, involvement of local leaders and familiar health workers or  
18  
19 514 CDDs are critical for implementation success. Potential barriers, including mistrust of free drug  
20  
21 515 distribution, fear of side effects, and limited perceived need of treatment can be addressed through  
22  
23 516 community sensitization and engagement of local leaders and trusted health workers. These findings were  
24  
25 517 used to shape implementation activities during the DeWorm3 trial, in order to ensure high acceptability  
26  
27 518 of the intervention and high cMDA coverage from the onset of the trial. Formative research exploring  
28  
29 519 attitudes and community-derived recommendations should be conducted when possible to improve  
30  
31 520 community acceptability of new interventions.  
32  
33  
34  
35

## 36 521 **Author contributions**

37  
38  
39 522 ARM, JLW, MCGC, SSRA, KK, and MI conceived of the initial study design. EA, SPK, FC, CIT, PN, MI, KK, KA,  
40  
41 523 AT, and YJ were involved in data collection and data processing. AR managed the data. AR, ABE, SL, and  
42  
43 524 ARM contributed to data analysis. SL, EA, and ARM led the writing of the paper. All authors read and  
44  
45 525 approved the final version of the manuscript.  
46  
47  
48

## 49 526 **Competing Interests**

50  
51  
52 527 None declared.  
53  
54

## 55 528 **Funding statement**

1  
2  
3 529 The DeWorm3 study was funded by the Bill & Melinda Gates Foundation  
4  
5 530 (<https://www.gatesfoundation.org/>) and (grant number OPP1129535). The funders had no role in study  
6  
7 531 design, data collection and analysis, decision to publish, or preparation of the manuscript.  
8  
9

#### 10 532 **Data availability**

11  
12  
13 533 Data are available from the DeWorm3 Institutional Data Access Committee (contact [dw3data@uw.edu](mailto:dw3data@uw.edu))  
14  
15 534 for researchers who meet criteria for data access.  
16  
17

#### 18 535 **Acknowledgements**

19  
20  
21 536 The authors wish to thank all of the study participants, communities and community leaders, national NTD  
22  
23 537 program staff and other local, regional and national partners who have participated or supported the  
24  
25 538 DeWorm3 study. We also would like to acknowledge the work of all members of the DeWorm3 study  
26  
27 539 teams and affiliated institutions. We give special thanks to Rachel Geyer, Elodie Yard, and Mira Emmanuel-  
28  
29 540 Fabula for contributions to data collection, management, or analysis. We thank Rajeshkumar Rajendran,  
30  
31 541 Surya Kulasekaran and Chinnaduraipandi Paulsamy for their support in data collection in the field sites in  
32  
33 542 India. We also thank Adolphe Kpatchavi, Roch Houngnihan and Abdoulaye Benon Monra for their support  
34  
35 543 during the training of surveyors in the Benin site.  
36  
37  
38  
39

40 544  
41  
42  
43  
44  
45  
46  
47  
48  
49  
50  
51  
52  
53  
54  
55  
56  
57  
58  
59  
60

## References

1. Hotez PJ, Molyneux DH, Fenwick A, Kumaresan J, Sachs SE, Sachs JD, et al. Control of neglected tropical diseases. *New England Journal of Medicine*. 2007;357(10):1018-27.
2. Jamison D, Breman J, Measham A, Alleyne G, Claeson M, Evans D, et al. Helminth Infections: Soil-transmitted Helminth Infections and Schistosomiasis--Disease Control Priorities in Developing Countries. 2006.
3. (WHO) WHO. Guideline on when to start antiretroviral therapy and on pre-exposure prophylaxis for HIV. 2015.
4. Brooker SJ, Nikolay B, Balabanova D, Pullan RL. Global feasibility assessment of interrupting the transmission of soil-transmitted helminths: a statistical modelling study. *The Lancet infectious diseases*. 2015;15(8):941-50.
5. Pullan RL, Halliday KE, Oswald WE, Mcharo C, Beaumont E, Kepha S, et al. Effects, equity, and cost of school-based and community-wide treatment strategies for soil-transmitted helminths in Kenya: a cluster-randomised controlled trial. *The Lancet*. 2019;393(10185):2039-50.
6. Lo NC, Bogoch II, Blackburn BG, Raso G, N'Goran EK, Coulibaly JT, et al. Comparison of community-wide, integrated mass drug administration strategies for schistosomiasis and soil-transmitted helminthiasis: a cost-effectiveness modelling study. *The Lancet Global Health*. 2015;3(10):e629-e38.
7. Farrell SH, Truscott JE, Anderson RM. The importance of patient compliance in repeated rounds of mass drug administration (MDA) for the elimination of intestinal helminth transmission. *Parasites & vectors*. 2017;10(1):291.
8. Shuford KV, Turner HC, Anderson RM. Compliance with anthelmintic treatment in the neglected tropical diseases control programmes: a systematic review. *Parasites & vectors*. 2016;9(1):29.
9. Yajima A, Mikhailov A, Mbabazi PS, Gabrielli AF, Minchiotti S, Montresor A, et al. Preventive Chemotherapy and Transmission Control (PCT) databank: a tool for planning, implementation and monitoring of integrated preventive chemotherapy for control of neglected tropical diseases. *Transactions of the Royal Society of Tropical Medicine and Hygiene*. 2012;106(4):215-22.
10. Krentel A, Fischer PU, Weil GJ. A review of factors that influence individual compliance with mass drug administration for elimination of lymphatic filariasis. *PLoS Negl Trop Dis*. 2013;7(11):e2447.
11. Gyapong JO, Owusu IO, Vroom FBd-C, Mensah EO, Gyapong M. Elimination of lymphatic filariasis: current perspectives on mass drug administration. *Research and reports in tropical medicine*. 2018;9:25.
12. Silumbwe A, Halwindi H, Zulu JM. How community engagement strategies shape participation in mass drug administration programmes for lymphatic filariasis: The case of Luangwa District, Zambia. *PLoS Negl Trop Dis*. 2019;13(11):e0007861.
13. Stetler C, Legro M, Wallace C, Bowman C, Guihan M, Hagedorn H, et al. The role of formative evaluation in implementation research and the QUERI experience. *Journal of general internal medicine and the QUERI experience*. *Journal of General Internal Medicine*. 2006;21(2):S1-8.
14. Lugtenberg M, Burgers J, Westert G. Effects of evidence-based clinical practice guidelines on quality of care: a systematic review. *BMJ Quality & Safety*. 2009;18(5):385-92.
15. Ásbjörnsdóttir KH, Ajjampur SSR, Anderson RM, Bailey R, Gardiner I, Halliday KE, et al. Assessing the feasibility of interrupting the transmission of soil-transmitted helminths through mass drug administration: The DeWorm3 cluster randomized trial protocol. *PLoS neglected tropical diseases*. 2018;12(1).

16. Curran GM, Bauer M, Mittman B, Pyne JM, Stetler C. Effectiveness-implementation hybrid designs: combining elements of clinical effectiveness and implementation research to enhance public health impact. *Medical care*. 2012;50(3):217.
17. Means AR, Ajjampur SS, Bailey R, Galactionova K, Gwayi-Chore M-C, Halliday K, et al. Evaluating the sustainability, scalability, and replicability of an STH transmission interruption intervention: The DeWorm3 implementation science protocol. *PLoS neglected tropical diseases*. 2018;12(1):e0005988.
18. Damschroder LJ, Aron DC, Keith RE, Kirsh SR, Alexander JA, Lowery JC. Fostering implementation of health services research findings into practice: a consolidated framework for advancing implementation science. *Implement Sci*. 2009;4:50.
19. Means A, Kemp C, Gwayi-Chore M, Gimbel S, Soi C, Sherr K, et al. Evaluating and optimizing the consolidated framework for implementation research (CFIR) for use in low-and middle-income countries: a systematic review. *Implementation Science*. 2020;15(1):1-9.
20. Kirk MA, Kelley C, Yankey N, Birken SA, Abadie B, Damschroder L. A systematic review of the use of the consolidated framework for implementation research. *Implementation Science*. 2015;11(1):72.
21. Cassell C, Symon G. *Essential guide to qualitative methods in organizational research*: Sage; 2004.
22. Nowell LS, Norris JM, White DE, Moules NJ. Thematic analysis: Striving to meet the trustworthiness criteria. *International Journal of Qualitative Methods*. 2017;16(1):1609406917733847.
23. Babu BV, Satyanarayana K. Factors responsible for coverage and compliance in mass drug administration during the programme to eliminate lymphatic filariasis in the East Godavari District, South India. *Trop Doct*. 2003;33(2):79-82.
24. Gunawardena S, Ismail M, Bradley M, Karunaweera N. Factors influencing drug compliance in the mass drug administration programme against filariasis in the Western province of Sri Lanka. *Transactions of the Royal Society of Tropical Medicine and Hygiene*. 2007;101(5):445-53.
25. Ahorlu CSK, Koka E, Adu-Amankwah S, Otchere J, de Souza DK. Community perspectives on persistent transmission of lymphatic filariasis in three hotspot districts in Ghana after 15 rounds of mass drug administration: a qualitative assessment. *BMC public health*. 2018;18(1):238.
26. Legge H, Kepha S, Prochazka M, Halliday K, Pullan R, Gwayi-Chore MC, et al. Implementer and recipient perspectives of community-wide mass drug administration for soil-transmitted helminths in Kwale County, Kenya. *PLoS Negl Trop Dis*. 2020;14(4):e0008258.
27. Babu BV, Mishra S. Mass drug administration under the programme to eliminate lymphatic filariasis in Orissa, India: a mixed-methods study to identify factors associated with compliance and non-compliance. *Transactions of the Royal Society of Tropical Medicine and Hygiene*. 2008;102(12):1207-13.
28. Dial NJ, Ceesay SJ, Gosling RD, D'Alessandro U, Baltzell KA. A qualitative study to assess community barriers to malaria mass drug administration trials in The Gambia. *Malaria Journal*. 2014;13(1):47.
29. Wanzira H, Naiga S, Mulebeke R, Bukenya F, Nabukenya M, Omoding O, et al. Community facilitators and barriers to a successful implementation of mass drug administration and indoor residual spraying for malaria prevention in Uganda: a qualitative study. *Malar J*. 2018;17(1):474.
30. Lahariya C, Mishra A. Strengthening of mass drug administration implementation is required to eliminate lymphatic filariasis from India: an evaluation study. *J Vector Borne Dis*. 2008;45(4):313-20.
31. Kisoka WJ, Simonsen PE, Malecela MN, Tersbøl BP, Mushi DL, Meyrowitsch DW. Factors influencing drug uptake during mass drug administration for control of lymphatic filariasis in rural and urban Tanzania. *PLoS One*. 2014;9(10):e109316.
32. Nery SV, Pickering AJ, Abate E, Asmare A, Barrett L, Benjamin-Chung J, et al. The role of water, sanitation and hygiene interventions in reducing soil-transmitted helminths: interpreting the evidence and identifying next steps. *Parasites & vectors*. 2019;12(1):273.
33. Gyapong JO, Owusu IO, da-Costa Vroom FB, Mensah EO, Gyapong M. Elimination of lymphatic filariasis: current perspectives on mass drug administration. *Res Rep Trop Med*. 2018;9:25-33.

- 1  
2  
3 34. Kisoka WJ, Tersbol BP, Meyrowitsch DW, Simonsen PE, Mushi DL. Community Members'  
4 Perceptions of Mass Drug Administration for Control of Lymphatic Filariasis in Rural and Urban Tanzania.  
5 *J Biosoc Sci.* 2016;48(1):94-112.  
6  
7 35. Sousa-Figueiredo JC, Pleasant J, Day M, Betson M, Rollinson D, Montresor A, et al. Treatment of  
8 intestinal schistosomiasis in Ugandan preschool children: best diagnosis, treatment efficacy and side-  
9 effects, and an extended praziquantel dosing pole. *International Health.* 2010;2(2):103-13.  
10  
11 36. Musuva RM, Matey E, Masaku J, Odhiambo G, Mwendu F, Thuita I, et al. Lessons from  
12 implementing mass drug administration for soil transmitted helminths among pre-school aged children  
13 during school based deworming program at the Kenyan coast. *BMC public health.* 2017;17(1):575.  
14  
15 37. Omedo MO, Matey EJ, Awiti A, Ogutu M, Alaii J, Karanja DM, et al. Community health workers'  
16 experiences and perspectives on mass drug administration for schistosomiasis control in western Kenya:  
17 the SCORE Project. *The American journal of tropical medicine and hygiene.* 2012;87(6):1065-72.  
18  
19 38. Cantey PT, Rout J, Rao G, Williamson J, Fox LM. Increasing compliance with mass drug  
20 administration programs for lymphatic filariasis in India through education and lymphedema  
21 management programs. *PLoS Negl Trop Dis.* 2010;4(6):e728.  
22  
23 39. Garfield RM, Vermund SH. Health education and community participation in mass drug  
24 administration for malaria in Nicaragua. *Social Science & Medicine.* 1986;22(8):869-77.  
25  
26 40. De Martin S, Von Seidlein L, Deen JL, Pinder M, Walraven G, Greenwood B. Community  
27 perceptions of a mass administration of an antimalarial drug combination in The Gambia. *Tropical*  
28 *Medicine & International Health.* 2001;6(6):442-8.  
29  
30 41. Mulugeta A, Gebregergs GB, Asfaw S, Yemane D, Mitiku M, Meresa B, et al. Coverage, social  
31 mobilization and challenges of mass Zithromax administration campaign in South and South East zones of  
32 Tigray, Northern Ethiopia: A cross sectional study. *PLoS neglected tropical diseases.* 2018;12(2):e0006288.  
33  
34  
35  
36  
37  
38  
39  
40  
41  
42  
43  
44  
45  
46  
47  
48  
49  
50  
51  
52  
53  
54  
55  
56  
57  
58  
59  
60



## Appendix 1. Qualitative interview guides

### Interview guide #1: Health Centre & DeWorm3 Supervisory Teams

|    | Question                                                                                                                                                                                                                                                                                                                                                 |
|----|----------------------------------------------------------------------------------------------------------------------------------------------------------------------------------------------------------------------------------------------------------------------------------------------------------------------------------------------------------|
| 1  | What kind of information or evidence are you aware of that shows whether or not community-wide MDA for interrupting transmission of STH will work in your setting?                                                                                                                                                                                       |
| 2  | <p><i>Follow-up questions:</i></p> <ul style="list-style-type: none"> <li>• <i>Is this evidence strong or weak?</i></li> <li>• <i>What evidence are you aware of from your own research? Practice guidelines? Published literature? Other settings?</i></li> <li>• <i>How does this knowledge affect your perception of the intervention?</i></li> </ul> |
| 3  | What advantages does community-wide MDA for STH have compared to school-age targeted programs? What disadvantages?                                                                                                                                                                                                                                       |
| 4  | When delivering community-wide MDA for STH, what local adaptations should be made so that the intervention is effective?                                                                                                                                                                                                                                 |
| 5  | <p><i>Follow-up questions:</i></p> <ul style="list-style-type: none"> <li>• <i>What aspects of the intervention should not be adapted?</i></li> <li>• <i>Do you think you will be able to make these adaptations? Why or why not?</i></li> </ul>                                                                                                         |
| 6  | How complicated is delivery of the entire community-wide MDA for STH intervention? Please consider the following aspects of the intervention: duration of an MDA round, target population, and number of steps and sub-activities involved to fully implement.                                                                                           |
| 7  | What supportive materials or tools are needed to ensure effective implementation of community-wide MDA for STH?                                                                                                                                                                                                                                          |
| 8  | What community-wide MDA for STH activities are built upon the previous LF MDA program infrastructure and experiences?                                                                                                                                                                                                                                    |
| 9  | <p><i>Follow-up questions:</i></p> <ul style="list-style-type: none"> <li>• <i>If none, what LF program activities could be leveraged for community-wide MDA for STH?</i></li> </ul>                                                                                                                                                                     |
| 10 | From your perspective, what are unique costs of implementing community-wide MDA for STH, relative to the standard of care of school-age targeted MDA?                                                                                                                                                                                                    |
| 11 | What barriers might community members face in participating in community-wide MDA for STH?                                                                                                                                                                                                                                                               |
| 12 | <p><i>Follow-up question:</i></p> <ul style="list-style-type: none"> <li>• <i>What could be done to overcome these barriers?</i></li> </ul>                                                                                                                                                                                                              |
| 13 | What kinds of infrastructure changes to the health system will be needed to accommodate community-wide MDA for STH?                                                                                                                                                                                                                                      |
| 14 | <p><i>Follow-up questions:</i></p>                                                                                                                                                                                                                                                                                                                       |

|    | Question                                                                                                                                                                                                                                                                                                                                                                                                                                                                                                           |
|----|--------------------------------------------------------------------------------------------------------------------------------------------------------------------------------------------------------------------------------------------------------------------------------------------------------------------------------------------------------------------------------------------------------------------------------------------------------------------------------------------------------------------|
|    | <ul style="list-style-type: none"> <li>• <i>If community-wide MDA for STH is scaled-up after the DeWorm3 project, will there need to be any changes in formal policies? Changes in information systems or data reporting systems? Other?</i></li> <li>• <i>What kind of approvals do you think will be needed to transition the STH program entirely to community-wide MDA? Who will need to be involved?</i></li> <li>• <i>Can you describe the process that will be needed to make these changes?</i></li> </ul> |
| 10 | How accepting are your co-workers of implementing community-wide MDA for STH? Why?                                                                                                                                                                                                                                                                                                                                                                                                                                 |
| 11 | <p>Do you think community-wide MDA for STH could be integrated into routine MOH programs?</p> <p><i>Follow-up questions:</i></p> <ul style="list-style-type: none"> <li>• <i>If yes, how? If no, why not?</i></li> <li>• <i>What would the effects of integration on routine programs be?</i></li> </ul>                                                                                                                                                                                                           |
| 12 | How important do you think it is to implement community-wide MDA for STH compared to the other health priorities?                                                                                                                                                                                                                                                                                                                                                                                                  |
| 13 | Do you feel incentivized to ensure that the DeWorm3 trial is successful in interrupting transmission of STH? What is the incentive?                                                                                                                                                                                                                                                                                                                                                                                |
| 14 | <p>How supportive are government and non-governmental leadership of implementing community-wide MDA for STH?</p> <p><i>Follow-up question:</i></p> <ul style="list-style-type: none"> <li>• <i>How do you think it will affect uptake/implementation?</i></li> </ul>                                                                                                                                                                                                                                               |
| 15 | <p>What kind of relevant training will you have during this intervention? Do you feel the training will prepare you to carry out the roles and responsibilities expected of you? How so?</p> <p><i>Follow-up questions:</i></p> <ul style="list-style-type: none"> <li>• <i>What are the positive aspects of the training?</i></li> <li>• <i>What is missing?</i></li> <li>• <i>What kind of continued training is necessary?</i></li> </ul>                                                                       |
| 16 | Do you think that community-wide MDA could interrupt STH transmission (i.e. stop the spread of intestinal worms) in your setting? Why or why not?                                                                                                                                                                                                                                                                                                                                                                  |
| 17 | How confident are you that you will be able to successfully carry out your DeWorm3 related duties? What gives you that level of confidence (or lack of confidence)?                                                                                                                                                                                                                                                                                                                                                |
| 18 | <p>Can you describe your team's plan for implementing community-wide MDA for STH?</p> <p><i>Follow-up questions:</i></p> <ul style="list-style-type: none"> <li>• <i>Do you think everyone involved understands the plan well, or is it too complicated?</i></li> <li>• <i>What do you do if you have to modify or revise the plan due to challenges, errors, or mistakes?</i></li> </ul>                                                                                                                          |
| 19 | Who are the key influential individuals or organizations to get buy-in from during the DeWorm3 study?                                                                                                                                                                                                                                                                                                                                                                                                              |

|    | Question                                                                                                            |
|----|---------------------------------------------------------------------------------------------------------------------|
| 20 | How should community members be informed about community-wide MDA or other DeWorm3 interventions before they occur? |
| 21 | What are some strategies to achieve high MDA treatment coverage?                                                    |
| 22 | Is there any other information that you would like to share about community-wide MDA today?                         |

## Interview Guide #2: Community Drug Distributors & Community Health Workers

| #  | Question                                                                                                                                                                                                                                                                                                                                                |
|----|---------------------------------------------------------------------------------------------------------------------------------------------------------------------------------------------------------------------------------------------------------------------------------------------------------------------------------------------------------|
| 1  | What advantages does community-wide MDA for STH have compared to school-age targeted programs? What disadvantages?                                                                                                                                                                                                                                      |
| 2  | When delivering community-wide MDA for STH, what local adaptations should be made so that the intervention is effective?<br><i>Follow-up questions:</i> <ul style="list-style-type: none"> <li>• What aspects of the intervention should not be adapted?</li> <li>• Do you think you will be able to make these adaptations? Why or why not?</li> </ul> |
| 3  | How complicated is delivery of the entire community-wide MDA for STH intervention? Please consider the following aspects of the intervention: duration of an MDA round, target population, and number of steps and sub-activities involved to fully implement.                                                                                          |
| 4  | What supportive materials or tools are needed to ensure effective implementation of community-wide MDA for STH?                                                                                                                                                                                                                                         |
| 5  | From your perspective, what are unique costs of implementing community-wide MDA for STH, relative to the standard of care of school-age targeted MDA?                                                                                                                                                                                                   |
| 6  | What barriers might community members face in participating in community-wide MDA for STH?<br><i>Follow-up question:</i> <ul style="list-style-type: none"> <li>• What could be done to overcome these barriers?</li> </ul>                                                                                                                             |
| 10 | How accepting are your co-workers of implementing community-wide MDA for STH? Why?                                                                                                                                                                                                                                                                      |
| 11 | Do you think community-wide MDA for STH could be integrated into routine MOH programs?<br><i>Follow-up questions:</i> <ul style="list-style-type: none"> <li>• If yes, how? If no, why not?</li> <li>• What would the effects of integration on routine programs be?</li> </ul>                                                                         |
| 12 | How important do you think it is to implement community-wide MDA for STH compared to the other health priorities?                                                                                                                                                                                                                                       |
| 13 | Do you feel incentivized to ensure that the DeWorm3 trial is successful in interrupting transmission of STH? What is the incentive?                                                                                                                                                                                                                     |
| 14 | How supportive are government and non-governmental leadership of implementing community-wide MDA for STH?                                                                                                                                                                                                                                               |

| #  | Question                                                                                                                                                                                                                                                                                                                                                                                                                                     |
|----|----------------------------------------------------------------------------------------------------------------------------------------------------------------------------------------------------------------------------------------------------------------------------------------------------------------------------------------------------------------------------------------------------------------------------------------------|
|    | <p><i>Follow-up question:</i></p> <ul style="list-style-type: none"> <li>• <i>How do you think it will affect uptake/implementation?</i></li> </ul>                                                                                                                                                                                                                                                                                          |
| 15 | <p>What kind of relevant training will you have during this intervention? Do you feel the training will prepare you to carry out the roles and responsibilities expected of you? How so?</p> <p><i>Follow-up questions:</i></p> <ul style="list-style-type: none"> <li>• <i>What are the positive aspects of the training?</i></li> <li>• <i>What is missing?</i></li> <li>• <i>What kind of continued training is necessary?</i></li> </ul> |
| 16 | Do you think that community-wide MDA could interrupt STH transmission (i.e. stop the spread of intestinal worms) in your setting? Why or why not?                                                                                                                                                                                                                                                                                            |
| 17 | How confident are you that you will be able to successfully carry out your DeWorm3 related duties? What gives you that level of confidence (or lack of confidence)?                                                                                                                                                                                                                                                                          |
| 18 | <p>Can you describe your team's plan for implementing community-wide MDA for STH?</p> <p><i>Follow-up questions:</i></p> <ul style="list-style-type: none"> <li>• <i>Do you think everyone involved understands the plan well, or is it too complicated?</i></li> <li>• <i>What do you do if you have to modify or revise the plan due to challenges, errors, or mistakes?</i></li> </ul>                                                    |
| 19 | Who are the key influential individuals or organizations to get buy-in from during the DeWorm3 study?                                                                                                                                                                                                                                                                                                                                        |
| 20 | How should community members be informed about community-wide MDA or other DeWorm3 interventions before they occur?                                                                                                                                                                                                                                                                                                                          |
| 21 | What are some strategies to achieve high MDA treatment coverage?                                                                                                                                                                                                                                                                                                                                                                             |
| 22 | Is there any other information that you would like to share about community-wide MDA today?                                                                                                                                                                                                                                                                                                                                                  |

### Interview Guide #3: Community members

| # | Question                                                                                                                                                                                                                                                                             |
|---|--------------------------------------------------------------------------------------------------------------------------------------------------------------------------------------------------------------------------------------------------------------------------------------|
| 1 | <p>What advantages does community-wide MDA for STH have compared to school-age targeted programs?</p> <p><i>Follow-up question:</i></p> <ul style="list-style-type: none"> <li>• <i>What disadvantages?</i></li> </ul>                                                               |
| 2 | <p>When delivering community-wide MDA for STH, what local adaptations should be made so that the intervention is effective?</p> <p><i>Follow-up question:</i></p> <ul style="list-style-type: none"> <li>• <i>What aspects of the intervention should not be adapted?</i></li> </ul> |

| # | Question                                                                                                                                                                                                                                                                                                                                                                                                                                                                                                        |
|---|-----------------------------------------------------------------------------------------------------------------------------------------------------------------------------------------------------------------------------------------------------------------------------------------------------------------------------------------------------------------------------------------------------------------------------------------------------------------------------------------------------------------|
| 3 | <p>What barriers might community members face in participating in community-wide MDA for STH?</p> <p><i>Follow-up question:</i></p> <ul style="list-style-type: none"> <li>• <i>What could be done to overcome these barriers?</i></li> </ul>                                                                                                                                                                                                                                                                   |
| 4 | <p>Do you remember the lymphatic filariasis (LF) MDA programs that used to occur in this area? What do you remember about them?</p> <p><i>Follow-up questions:</i></p> <ul style="list-style-type: none"> <li>• <i>What could be done to overcome these barriers?</i></li> <li>• <i>Did you participate in those treatment days by swallowing the medicines given to you? Why or why not?</i></li> <li>• <i>Has that affected your interest in participating in the current mass treatment days?</i></li> </ul> |
| 5 | <p>Do you think that community-wide MDA could interrupt STH transmission (i.e. stop the spread of intestinal worms) in your setting? Why or why not?</p>                                                                                                                                                                                                                                                                                                                                                        |
| 6 | <p>Who are the key influential individuals or organizations to get buy-in from during the DeWorm3 study?</p> <p><i>Follow-up questions:</i></p> <ul style="list-style-type: none"> <li>• <i>Can you provide specific examples of why you think their buy-in is important?</i></li> </ul>                                                                                                                                                                                                                        |
| 7 | <p>How should community members be informed about community-wide MDA or other DeWorm3 interventions before they occur?</p>                                                                                                                                                                                                                                                                                                                                                                                      |
| 8 | <p>What are some strategies to achieve high MDA treatment coverage?</p>                                                                                                                                                                                                                                                                                                                                                                                                                                         |
| 9 | <p>Is there any other information that you would like to share about community-wide MDA today?</p>                                                                                                                                                                                                                                                                                                                                                                                                              |
